# Supplementary material
Source: HighWire-hosted journal article supplement (https://bmjopen.bmj.com/content/12/1/e049300)
Supplement: inline-supplementary-material-4 [file inline-supplementary-material-4.pdf]

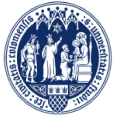

**UNIKLINIK  
KÖLN**

Zentrum für  
Palliativmedizin

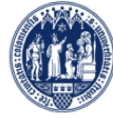

**UNIKLINIK  
KÖLN**

Klinik und Poliklinik  
für Neurologie

Cost booklet the study „**Communication, Coordination and Security** for people with **Multiple Sclerosis (COCOS-MS)**“

Please enter (*if known*):

**EDSS score:** \_\_\_\_\_ **MS progression:** \_\_\_\_\_

**Severely disabled:**  yes  no

*If yes, since when?* \_\_\_\_\_

*If yes, degree of disability:* \_\_\_\_\_

**Care level:**  yes  no

*If yes, which one:*  1  2  3  4  5

**OUTPATIENT TREATMENT / EXAMINATION / CONSULTATION**

**APPOINTMENTS (in the past three months)**

Did the patient see physicians / therapists of different disciplines?

yes  no

If yes, please checkmark and provide date:

|                                                                                                                                                                                                                                  | Date | Date | Date |
|----------------------------------------------------------------------------------------------------------------------------------------------------------------------------------------------------------------------------------|------|------|------|
| <b>A) Physicians of different disciplines</b>                                                                                                                                                                                    |      |      |      |
| <input type="radio"/> General physician                                                                                                                                                                                          |      |      |      |
| <input type="radio"/> Internal physician,<br>specify, if applicable:<br><input type="radio"/> Gastroenterologist<br><input type="radio"/> Cardiologist<br><input type="radio"/> Hamatologist<br><input type="radio"/> Oncologist |      |      |      |
| <input type="radio"/> Neurologist                                                                                                                                                                                                |      |      |      |

|                                                    |  |  |  |
|----------------------------------------------------|--|--|--|
| <input type="radio"/> MS special outpatient clinic |  |  |  |
| <input type="radio"/> Psychiatrist                 |  |  |  |
| <input type="radio"/> Urologist                    |  |  |  |
| <input type="radio"/> Gynecologist                 |  |  |  |
| <input type="radio"/> Ophthalmologist              |  |  |  |
| <input type="radio"/> Orthopaedist                 |  |  |  |
| <input type="radio"/> Dermatologist                |  |  |  |
| <input type="radio"/> Pain physician               |  |  |  |
| <input type="radio"/> Palliative care physician    |  |  |  |
| <b>B) Therapists</b>                               |  |  |  |
| <input type="radio"/> Occupational therapist       |  |  |  |
| <input type="radio"/> Speech therapist             |  |  |  |
| <input type="radio"/> Physiotherapist              |  |  |  |
| <input type="radio"/> Psychotherapist              |  |  |  |
| <input type="radio"/> Alternative practitioner     |  |  |  |
| <input type="radio"/> Osteopath                    |  |  |  |
| <b>C) Other medical services (e.g. opticians)</b>  |  |  |  |
| <input type="radio"/> _____                        |  |  |  |

|                                                                                                                                                                                                                                                                                                                                                                                                                                                                                                                                                                                                                                                                                                                                                                                                                                                                                                                                                                                                                                                                                                                                                                              |  |                                                                                                                                                                                                   |   |                                                                                                                                                                                                   |   |                                                                                                                                                                                                   |   |                                                                                                                                                                                                                                                                                                               |   |                                                                                                                                                                                                                                                                                                               |  |  |  |  |     |  |     |  |         |                                                                                                                                                                                                                                                                                                                                                                                                                                                                                                                                                                                                                                                                                                                                                                                                                                                                                                                                                                                                                                                                                                                                                                    |  |                                                                                                                                                                                                   |  |  |   |                                                                                                                                                                                                   |  |  |   |                                                                                                                                                                                                                                                                                                               |  |  |  |  |     |  |     |  |         |
|------------------------------------------------------------------------------------------------------------------------------------------------------------------------------------------------------------------------------------------------------------------------------------------------------------------------------------------------------------------------------------------------------------------------------------------------------------------------------------------------------------------------------------------------------------------------------------------------------------------------------------------------------------------------------------------------------------------------------------------------------------------------------------------------------------------------------------------------------------------------------------------------------------------------------------------------------------------------------------------------------------------------------------------------------------------------------------------------------------------------------------------------------------------------------|--|---------------------------------------------------------------------------------------------------------------------------------------------------------------------------------------------------|---|---------------------------------------------------------------------------------------------------------------------------------------------------------------------------------------------------|---|---------------------------------------------------------------------------------------------------------------------------------------------------------------------------------------------------|---|---------------------------------------------------------------------------------------------------------------------------------------------------------------------------------------------------------------------------------------------------------------------------------------------------------------|---|---------------------------------------------------------------------------------------------------------------------------------------------------------------------------------------------------------------------------------------------------------------------------------------------------------------|--|--|--|--|-----|--|-----|--|---------|--------------------------------------------------------------------------------------------------------------------------------------------------------------------------------------------------------------------------------------------------------------------------------------------------------------------------------------------------------------------------------------------------------------------------------------------------------------------------------------------------------------------------------------------------------------------------------------------------------------------------------------------------------------------------------------------------------------------------------------------------------------------------------------------------------------------------------------------------------------------------------------------------------------------------------------------------------------------------------------------------------------------------------------------------------------------------------------------------------------------------------------------------------------------|--|---------------------------------------------------------------------------------------------------------------------------------------------------------------------------------------------------|--|--|---|---------------------------------------------------------------------------------------------------------------------------------------------------------------------------------------------------|--|--|---|---------------------------------------------------------------------------------------------------------------------------------------------------------------------------------------------------------------------------------------------------------------------------------------------------------------|--|--|--|--|-----|--|-----|--|---------|
| <p>_____</p> <p>_____</p>                                                                                                                                                                                                                                                                                                                                                                                                                                                                                                                                                                                                                                                                                                                                                                                                                                                                                                                                                                                                                                                                                                                                                    |  |                                                                                                                                                                                                   |   |                                                                                                                                                                                                   |   |                                                                                                                                                                                                   |   |                                                                                                                                                                                                                                                                                                               |   |                                                                                                                                                                                                                                                                                                               |  |  |  |  |     |  |     |  |         |                                                                                                                                                                                                                                                                                                                                                                                                                                                                                                                                                                                                                                                                                                                                                                                                                                                                                                                                                                                                                                                                                                                                                                    |  |                                                                                                                                                                                                   |  |  |   |                                                                                                                                                                                                   |  |  |   |                                                                                                                                                                                                                                                                                                               |  |  |  |  |     |  |     |  |         |
| <b>INPATIENT TREATMENT (in the past three months)</b>                                                                                                                                                                                                                                                                                                                                                                                                                                                                                                                                                                                                                                                                                                                                                                                                                                                                                                                                                                                                                                                                                                                        |  |                                                                                                                                                                                                   |   |                                                                                                                                                                                                   |   |                                                                                                                                                                                                   |   |                                                                                                                                                                                                                                                                                                               |   |                                                                                                                                                                                                                                                                                                               |  |  |  |  |     |  |     |  |         |                                                                                                                                                                                                                                                                                                                                                                                                                                                                                                                                                                                                                                                                                                                                                                                                                                                                                                                                                                                                                                                                                                                                                                    |  |                                                                                                                                                                                                   |  |  |   |                                                                                                                                                                                                   |  |  |   |                                                                                                                                                                                                                                                                                                               |  |  |  |  |     |  |     |  |         |
| <p><b>A) Was an inpatient stay necessary?</b></p> <p><input type="radio"/> yes    <input type="radio"/> no</p> <p><i>If yes, please checkmark and provide length of stay:</i></p>                                                                                                                                                                                                                                                                                                                                                                                                                                                                                                                                                                                                                                                                                                                                                                                                                                                                                                                                                                                            |  |                                                                                                                                                                                                   |   |                                                                                                                                                                                                   |   |                                                                                                                                                                                                   |   |                                                                                                                                                                                                                                                                                                               |   |                                                                                                                                                                                                                                                                                                               |  |  |  |  |     |  |     |  |         |                                                                                                                                                                                                                                                                                                                                                                                                                                                                                                                                                                                                                                                                                                                                                                                                                                                                                                                                                                                                                                                                                                                                                                    |  |                                                                                                                                                                                                   |  |  |   |                                                                                                                                                                                                   |  |  |   |                                                                                                                                                                                                                                                                                                               |  |  |  |  |     |  |     |  |         |
|                                                                                                                                                                                                                                                                                                                                                                                                                                                                                                                                                                                                                                                                                                                                                                                                                                                                                                                                                                                                                                                                                                                                                                              |  | <b>Hospital ward</b>                                                                                                                                                                              |   |                                                                                                                                                                                                   |   |                                                                                                                                                                                                   |   |                                                                                                                                                                                                                                                                                                               |   |                                                                                                                                                                                                                                                                                                               |  |  |  |  |     |  |     |  |         |                                                                                                                                                                                                                                                                                                                                                                                                                                                                                                                                                                                                                                                                                                                                                                                                                                                                                                                                                                                                                                                                                                                                                                    |  |                                                                                                                                                                                                   |  |  |   |                                                                                                                                                                                                   |  |  |   |                                                                                                                                                                                                                                                                                                               |  |  |  |  |     |  |     |  |         |
| <input type="radio"/> Hospital                                                                                                                                                                                                                                                                                                                                                                                                                                                                                                                                                                                                                                                                                                                                                                                                                                                                                                                                                                                                                                                                                                                                               |  | <input type="radio"/> General ward <input type="radio"/> ICU<br><i>Reason for ICU:</i><br>_____                                                                                                   |   |                                                                                                                                                                                                   |   |                                                                                                                                                                                                   |   |                                                                                                                                                                                                                                                                                                               |   |                                                                                                                                                                                                                                                                                                               |  |  |  |  |     |  |     |  |         |                                                                                                                                                                                                                                                                                                                                                                                                                                                                                                                                                                                                                                                                                                                                                                                                                                                                                                                                                                                                                                                                                                                                                                    |  |                                                                                                                                                                                                   |  |  |   |                                                                                                                                                                                                   |  |  |   |                                                                                                                                                                                                                                                                                                               |  |  |  |  |     |  |     |  |         |
| <p><i>If yes, from</i></p> <table style="width: 100%; border: none;"> <tr> <td style="text-align: center;"> <table border="1" style="display: inline-table; border-collapse: collapse;"> <tr><td style="width: 20px; height: 20px;"></td></tr> <tr><td style="width: 20px; height: 20px;"></td></tr> </table> </td> <td style="text-align: center;">-</td> <td style="text-align: center;"> <table border="1" style="display: inline-table; border-collapse: collapse;"> <tr><td style="width: 20px; height: 20px;"></td></tr> <tr><td style="width: 20px; height: 20px;"></td></tr> </table> </td> <td style="text-align: center;">-</td> <td style="text-align: center;"> <table border="1" style="display: inline-table; border-collapse: collapse;"> <tr><td style="width: 20px; height: 20px;"></td></tr> </table> </td> </tr> <tr> <td style="text-align: center;">D D</td> <td></td> <td style="text-align: center;">M M</td> <td></td> <td style="text-align: center;">Y Y Y Y</td> </tr> </table> |  | <table border="1" style="display: inline-table; border-collapse: collapse;"> <tr><td style="width: 20px; height: 20px;"></td></tr> <tr><td style="width: 20px; height: 20px;"></td></tr> </table> |   |                                                                                                                                                                                                   | - | <table border="1" style="display: inline-table; border-collapse: collapse;"> <tr><td style="width: 20px; height: 20px;"></td></tr> <tr><td style="width: 20px; height: 20px;"></td></tr> </table> |   |                                                                                                                                                                                                                                                                                                               | - | <table border="1" style="display: inline-table; border-collapse: collapse;"> <tr><td style="width: 20px; height: 20px;"></td></tr> </table> |  |  |  |  | D D |  | M M |  | Y Y Y Y | <p><i>to</i></p> <table style="width: 100%; border: none;"> <tr> <td style="text-align: center;"> <table border="1" style="display: inline-table; border-collapse: collapse;"> <tr><td style="width: 20px; height: 20px;"></td></tr> <tr><td style="width: 20px; height: 20px;"></td></tr> </table> </td> <td style="text-align: center;">-</td> <td style="text-align: center;"> <table border="1" style="display: inline-table; border-collapse: collapse;"> <tr><td style="width: 20px; height: 20px;"></td></tr> <tr><td style="width: 20px; height: 20px;"></td></tr> </table> </td> <td style="text-align: center;">-</td> <td style="text-align: center;"> <table border="1" style="display: inline-table; border-collapse: collapse;"> <tr><td style="width: 20px; height: 20px;"></td></tr> </table> </td> </tr> <tr> <td style="text-align: center;">D D</td> <td></td> <td style="text-align: center;">M M</td> <td></td> <td style="text-align: center;">Y Y Y Y</td> </tr> </table> |  | <table border="1" style="display: inline-table; border-collapse: collapse;"> <tr><td style="width: 20px; height: 20px;"></td></tr> <tr><td style="width: 20px; height: 20px;"></td></tr> </table> |  |  | - | <table border="1" style="display: inline-table; border-collapse: collapse;"> <tr><td style="width: 20px; height: 20px;"></td></tr> <tr><td style="width: 20px; height: 20px;"></td></tr> </table> |  |  | - | <table border="1" style="display: inline-table; border-collapse: collapse;"> <tr><td style="width: 20px; height: 20px;"></td></tr> </table> |  |  |  |  | D D |  | M M |  | Y Y Y Y |
| <table border="1" style="display: inline-table; border-collapse: collapse;"> <tr><td style="width: 20px; height: 20px;"></td></tr> <tr><td style="width: 20px; height: 20px;"></td></tr> </table>                                                                                                                                                                                                                                                                                                                                                                                                                                                                                                                                                                                                                                                                                                                                                                                                                                                                                                                                                                            |  |                                                                                                                                                                                                   | - | <table border="1" style="display: inline-table; border-collapse: collapse;"> <tr><td style="width: 20px; height: 20px;"></td></tr> <tr><td style="width: 20px; height: 20px;"></td></tr> </table> |   |                                                                                                                                                                                                   | - | <table border="1" style="display: inline-table; border-collapse: collapse;"> <tr><td style="width: 20px; height: 20px;"></td></tr> </table> |   |                                                                                                                                                                                                                                                                                                               |  |  |  |  |     |  |     |  |         |                                                                                                                                                                                                                                                                                                                                                                                                                                                                                                                                                                                                                                                                                                                                                                                                                                                                                                                                                                                                                                                                                                                                                                    |  |                                                                                                                                                                                                   |  |  |   |                                                                                                                                                                                                   |  |  |   |                                                                                                                                                                                                                                                                                                               |  |  |  |  |     |  |     |  |         |
|                                                                                                                                                                                                                                                                                                                                                                                                                                                                                                                                                                                                                                                                                                                                                                                                                                                                                                                                                                                                                                                                                                                                                                              |  |                                                                                                                                                                                                   |   |                                                                                                                                                                                                   |   |                                                                                                                                                                                                   |   |                                                                                                                                                                                                                                                                                                               |   |                                                                                                                                                                                                                                                                                                               |  |  |  |  |     |  |     |  |         |                                                                                                                                                                                                                                                                                                                                                                                                                                                                                                                                                                                                                                                                                                                                                                                                                                                                                                                                                                                                                                                                                                                                                                    |  |                                                                                                                                                                                                   |  |  |   |                                                                                                                                                                                                   |  |  |   |                                                                                                                                                                                                                                                                                                               |  |  |  |  |     |  |     |  |         |
|                                                                                                                                                                                                                                                                                                                                                                                                                                                                                                                                                                                                                                                                                                                                                                                                                                                                                                                                                                                                                                                                                                                                                                              |  |                                                                                                                                                                                                   |   |                                                                                                                                                                                                   |   |                                                                                                                                                                                                   |   |                                                                                                                                                                                                                                                                                                               |   |                                                                                                                                                                                                                                                                                                               |  |  |  |  |     |  |     |  |         |                                                                                                                                                                                                                                                                                                                                                                                                                                                                                                                                                                                                                                                                                                                                                                                                                                                                                                                                                                                                                                                                                                                                                                    |  |                                                                                                                                                                                                   |  |  |   |                                                                                                                                                                                                   |  |  |   |                                                                                                                                                                                                                                                                                                               |  |  |  |  |     |  |     |  |         |
|                                                                                                                                                                                                                                                                                                                                                                                                                                                                                                                                                                                                                                                                                                                                                                                                                                                                                                                                                                                                                                                                                                                                                                              |  |                                                                                                                                                                                                   |   |                                                                                                                                                                                                   |   |                                                                                                                                                                                                   |   |                                                                                                                                                                                                                                                                                                               |   |                                                                                                                                                                                                                                                                                                               |  |  |  |  |     |  |     |  |         |                                                                                                                                                                                                                                                                                                                                                                                                                                                                                                                                                                                                                                                                                                                                                                                                                                                                                                                                                                                                                                                                                                                                                                    |  |                                                                                                                                                                                                   |  |  |   |                                                                                                                                                                                                   |  |  |   |                                                                                                                                                                                                                                                                                                               |  |  |  |  |     |  |     |  |         |
|                                                                                                                                                                                                                                                                                                                                                                                                                                                                                                                                                                                                                                                                                                                                                                                                                                                                                                                                                                                                                                                                                                                                                                              |  |                                                                                                                                                                                                   |   |                                                                                                                                                                                                   |   |                                                                                                                                                                                                   |   |                                                                                                                                                                                                                                                                                                               |   |                                                                                                                                                                                                                                                                                                               |  |  |  |  |     |  |     |  |         |                                                                                                                                                                                                                                                                                                                                                                                                                                                                                                                                                                                                                                                                                                                                                                                                                                                                                                                                                                                                                                                                                                                                                                    |  |                                                                                                                                                                                                   |  |  |   |                                                                                                                                                                                                   |  |  |   |                                                                                                                                                                                                                                                                                                               |  |  |  |  |     |  |     |  |         |
|                                                                                                                                                                                                                                                                                                                                                                                                                                                                                                                                                                                                                                                                                                                                                                                                                                                                                                                                                                                                                                                                                                                                                                              |  |                                                                                                                                                                                                   |   |                                                                                                                                                                                                   |   |                                                                                                                                                                                                   |   |                                                                                                                                                                                                                                                                                                               |   |                                                                                                                                                                                                                                                                                                               |  |  |  |  |     |  |     |  |         |                                                                                                                                                                                                                                                                                                                                                                                                                                                                                                                                                                                                                                                                                                                                                                                                                                                                                                                                                                                                                                                                                                                                                                    |  |                                                                                                                                                                                                   |  |  |   |                                                                                                                                                                                                   |  |  |   |                                                                                                                                                                                                                                                                                                               |  |  |  |  |     |  |     |  |         |
|                                                                                                                                                                                                                                                                                                                                                                                                                                                                                                                                                                                                                                                                                                                                                                                                                                                                                                                                                                                                                                                                                                                                                                              |  |                                                                                                                                                                                                   |   |                                                                                                                                                                                                   |   |                                                                                                                                                                                                   |   |                                                                                                                                                                                                                                                                                                               |   |                                                                                                                                                                                                                                                                                                               |  |  |  |  |     |  |     |  |         |                                                                                                                                                                                                                                                                                                                                                                                                                                                                                                                                                                                                                                                                                                                                                                                                                                                                                                                                                                                                                                                                                                                                                                    |  |                                                                                                                                                                                                   |  |  |   |                                                                                                                                                                                                   |  |  |   |                                                                                                                                                                                                                                                                                                               |  |  |  |  |     |  |     |  |         |
|                                                                                                                                                                                                                                                                                                                                                                                                                                                                                                                                                                                                                                                                                                                                                                                                                                                                                                                                                                                                                                                                                                                                                                              |  |                                                                                                                                                                                                   |   |                                                                                                                                                                                                   |   |                                                                                                                                                                                                   |   |                                                                                                                                                                                                                                                                                                               |   |                                                                                                                                                                                                                                                                                                               |  |  |  |  |     |  |     |  |         |                                                                                                                                                                                                                                                                                                                                                                                                                                                                                                                                                                                                                                                                                                                                                                                                                                                                                                                                                                                                                                                                                                                                                                    |  |                                                                                                                                                                                                   |  |  |   |                                                                                                                                                                                                   |  |  |   |                                                                                                                                                                                                                                                                                                               |  |  |  |  |     |  |     |  |         |
|                                                                                                                                                                                                                                                                                                                                                                                                                                                                                                                                                                                                                                                                                                                                                                                                                                                                                                                                                                                                                                                                                                                                                                              |  |                                                                                                                                                                                                   |   |                                                                                                                                                                                                   |   |                                                                                                                                                                                                   |   |                                                                                                                                                                                                                                                                                                               |   |                                                                                                                                                                                                                                                                                                               |  |  |  |  |     |  |     |  |         |                                                                                                                                                                                                                                                                                                                                                                                                                                                                                                                                                                                                                                                                                                                                                                                                                                                                                                                                                                                                                                                                                                                                                                    |  |                                                                                                                                                                                                   |  |  |   |                                                                                                                                                                                                   |  |  |   |                                                                                                                                                                                                                                                                                                               |  |  |  |  |     |  |     |  |         |
| D D                                                                                                                                                                                                                                                                                                                                                                                                                                                                                                                                                                                                                                                                                                                                                                                                                                                                                                                                                                                                                                                                                                                                                                          |  | M M                                                                                                                                                                                               |   | Y Y Y Y                                                                                                                                                                                           |   |                                                                                                                                                                                                   |   |                                                                                                                                                                                                                                                                                                               |   |                                                                                                                                                                                                                                                                                                               |  |  |  |  |     |  |     |  |         |                                                                                                                                                                                                                                                                                                                                                                                                                                                                                                                                                                                                                                                                                                                                                                                                                                                                                                                                                                                                                                                                                                                                                                    |  |                                                                                                                                                                                                   |  |  |   |                                                                                                                                                                                                   |  |  |   |                                                                                                                                                                                                                                                                                                               |  |  |  |  |     |  |     |  |         |
| <table border="1" style="display: inline-table; border-collapse: collapse;"> <tr><td style="width: 20px; height: 20px;"></td></tr> <tr><td style="width: 20px; height: 20px;"></td></tr> </table>                                                                                                                                                                                                                                                                                                                                                                                                                                                                                                                                                                                                                                                                                                                                                                                                                                                                                                                                                                            |  |                                                                                                                                                                                                   | - | <table border="1" style="display: inline-table; border-collapse: collapse;"> <tr><td style="width: 20px; height: 20px;"></td></tr> <tr><td style="width: 20px; height: 20px;"></td></tr> </table> |   |                                                                                                                                                                                                   | - | <table border="1" style="display: inline-table; border-collapse: collapse;"> <tr><td style="width: 20px; height: 20px;"></td></tr> </table> |   |                                                                                                                                                                                                                                                                                                               |  |  |  |  |     |  |     |  |         |                                                                                                                                                                                                                                                                                                                                                                                                                                                                                                                                                                                                                                                                                                                                                                                                                                                                                                                                                                                                                                                                                                                                                                    |  |                                                                                                                                                                                                   |  |  |   |                                                                                                                                                                                                   |  |  |   |                                                                                                                                                                                                                                                                                                               |  |  |  |  |     |  |     |  |         |
|                                                                                                                                                                                                                                                                                                                                                                                                                                                                                                                                                                                                                                                                                                                                                                                                                                                                                                                                                                                                                                                                                                                                                                              |  |                                                                                                                                                                                                   |   |                                                                                                                                                                                                   |   |                                                                                                                                                                                                   |   |                                                                                                                                                                                                                                                                                                               |   |                                                                                                                                                                                                                                                                                                               |  |  |  |  |     |  |     |  |         |                                                                                                                                                                                                                                                                                                                                                                                                                                                                                                                                                                                                                                                                                                                                                                                                                                                                                                                                                                                                                                                                                                                                                                    |  |                                                                                                                                                                                                   |  |  |   |                                                                                                                                                                                                   |  |  |   |                                                                                                                                                                                                                                                                                                               |  |  |  |  |     |  |     |  |         |
|                                                                                                                                                                                                                                                                                                                                                                                                                                                                                                                                                                                                                                                                                                                                                                                                                                                                                                                                                                                                                                                                                                                                                                              |  |                                                                                                                                                                                                   |   |                                                                                                                                                                                                   |   |                                                                                                                                                                                                   |   |                                                                                                                                                                                                                                                                                                               |   |                                                                                                                                                                                                                                                                                                               |  |  |  |  |     |  |     |  |         |                                                                                                                                                                                                                                                                                                                                                                                                                                                                                                                                                                                                                                                                                                                                                                                                                                                                                                                                                                                                                                                                                                                                                                    |  |                                                                                                                                                                                                   |  |  |   |                                                                                                                                                                                                   |  |  |   |                                                                                                                                                                                                                                                                                                               |  |  |  |  |     |  |     |  |         |
|                                                                                                                                                                                                                                                                                                                                                                                                                                                                                                                                                                                                                                                                                                                                                                                                                                                                                                                                                                                                                                                                                                                                                                              |  |                                                                                                                                                                                                   |   |                                                                                                                                                                                                   |   |                                                                                                                                                                                                   |   |                                                                                                                                                                                                                                                                                                               |   |                                                                                                                                                                                                                                                                                                               |  |  |  |  |     |  |     |  |         |                                                                                                                                                                                                                                                                                                                                                                                                                                                                                                                                                                                                                                                                                                                                                                                                                                                                                                                                                                                                                                                                                                                                                                    |  |                                                                                                                                                                                                   |  |  |   |                                                                                                                                                                                                   |  |  |   |                                                                                                                                                                                                                                                                                                               |  |  |  |  |     |  |     |  |         |
|                                                                                                                                                                                                                                                                                                                                                                                                                                                                                                                                                                                                                                                                                                                                                                                                                                                                                                                                                                                                                                                                                                                                                                              |  |                                                                                                                                                                                                   |   |                                                                                                                                                                                                   |   |                                                                                                                                                                                                   |   |                                                                                                                                                                                                                                                                                                               |   |                                                                                                                                                                                                                                                                                                               |  |  |  |  |     |  |     |  |         |                                                                                                                                                                                                                                                                                                                                                                                                                                                                                                                                                                                                                                                                                                                                                                                                                                                                                                                                                                                                                                                                                                                                                                    |  |                                                                                                                                                                                                   |  |  |   |                                                                                                                                                                                                   |  |  |   |                                                                                                                                                                                                                                                                                                               |  |  |  |  |     |  |     |  |         |
|                                                                                                                                                                                                                                                                                                                                                                                                                                                                                                                                                                                                                                                                                                                                                                                                                                                                                                                                                                                                                                                                                                                                                                              |  |                                                                                                                                                                                                   |   |                                                                                                                                                                                                   |   |                                                                                                                                                                                                   |   |                                                                                                                                                                                                                                                                                                               |   |                                                                                                                                                                                                                                                                                                               |  |  |  |  |     |  |     |  |         |                                                                                                                                                                                                                                                                                                                                                                                                                                                                                                                                                                                                                                                                                                                                                                                                                                                                                                                                                                                                                                                                                                                                                                    |  |                                                                                                                                                                                                   |  |  |   |                                                                                                                                                                                                   |  |  |   |                                                                                                                                                                                                                                                                                                               |  |  |  |  |     |  |     |  |         |
|                                                                                                                                                                                                                                                                                                                                                                                                                                                                                                                                                                                                                                                                                                                                                                                                                                                                                                                                                                                                                                                                                                                                                                              |  |                                                                                                                                                                                                   |   |                                                                                                                                                                                                   |   |                                                                                                                                                                                                   |   |                                                                                                                                                                                                                                                                                                               |   |                                                                                                                                                                                                                                                                                                               |  |  |  |  |     |  |     |  |         |                                                                                                                                                                                                                                                                                                                                                                                                                                                                                                                                                                                                                                                                                                                                                                                                                                                                                                                                                                                                                                                                                                                                                                    |  |                                                                                                                                                                                                   |  |  |   |                                                                                                                                                                                                   |  |  |   |                                                                                                                                                                                                                                                                                                               |  |  |  |  |     |  |     |  |         |
|                                                                                                                                                                                                                                                                                                                                                                                                                                                                                                                                                                                                                                                                                                                                                                                                                                                                                                                                                                                                                                                                                                                                                                              |  |                                                                                                                                                                                                   |   |                                                                                                                                                                                                   |   |                                                                                                                                                                                                   |   |                                                                                                                                                                                                                                                                                                               |   |                                                                                                                                                                                                                                                                                                               |  |  |  |  |     |  |     |  |         |                                                                                                                                                                                                                                                                                                                                                                                                                                                                                                                                                                                                                                                                                                                                                                                                                                                                                                                                                                                                                                                                                                                                                                    |  |                                                                                                                                                                                                   |  |  |   |                                                                                                                                                                                                   |  |  |   |                                                                                                                                                                                                                                                                                                               |  |  |  |  |     |  |     |  |         |
|                                                                                                                                                                                                                                                                                                                                                                                                                                                                                                                                                                                                                                                                                                                                                                                                                                                                                                                                                                                                                                                                                                                                                                              |  |                                                                                                                                                                                                   |   |                                                                                                                                                                                                   |   |                                                                                                                                                                                                   |   |                                                                                                                                                                                                                                                                                                               |   |                                                                                                                                                                                                                                                                                                               |  |  |  |  |     |  |     |  |         |                                                                                                                                                                                                                                                                                                                                                                                                                                                                                                                                                                                                                                                                                                                                                                                                                                                                                                                                                                                                                                                                                                                                                                    |  |                                                                                                                                                                                                   |  |  |   |                                                                                                                                                                                                   |  |  |   |                                                                                                                                                                                                                                                                                                               |  |  |  |  |     |  |     |  |         |
| D D                                                                                                                                                                                                                                                                                                                                                                                                                                                                                                                                                                                                                                                                                                                                                                                                                                                                                                                                                                                                                                                                                                                                                                          |  | M M                                                                                                                                                                                               |   | Y Y Y Y                                                                                                                                                                                           |   |                                                                                                                                                                                                   |   |                                                                                                                                                                                                                                                                                                               |   |                                                                                                                                                                                                                                                                                                               |  |  |  |  |     |  |     |  |         |                                                                                                                                                                                                                                                                                                                                                                                                                                                                                                                                                                                                                                                                                                                                                                                                                                                                                                                                                                                                                                                                                                                                                                    |  |                                                                                                                                                                                                   |  |  |   |                                                                                                                                                                                                   |  |  |   |                                                                                                                                                                                                                                                                                                               |  |  |  |  |     |  |     |  |         |
| <p><b>Co-payment:</b> _____</p>                                                                                                                                                                                                                                                                                                                                                                                                                                                                                                                                                                                                                                                                                                                                                                                                                                                                                                                                                                                                                                                                                                                                              |  |                                                                                                                                                                                                   |   |                                                                                                                                                                                                   |   |                                                                                                                                                                                                   |   |                                                                                                                                                                                                                                                                                                               |   |                                                                                                                                                                                                                                                                                                               |  |  |  |  |     |  |     |  |         |                                                                                                                                                                                                                                                                                                                                                                                                                                                                                                                                                                                                                                                                                                                                                                                                                                                                                                                                                                                                                                                                                                                                                                    |  |                                                                                                                                                                                                   |  |  |   |                                                                                                                                                                                                   |  |  |   |                                                                                                                                                                                                                                                                                                               |  |  |  |  |     |  |     |  |         |
| <p><b>from</b></p> <table style="width: 100%; border: none;"> <tr> <td style="text-align: center;"> <table border="1" style="display: inline-table; border-collapse: collapse;"> <tr><td style="width: 20px; height: 20px;"></td></tr> <tr><td style="width: 20px; height: 20px;"></td></tr> </table> </td> <td style="text-align: center;">-</td> <td style="text-align: center;"> <table border="1" style="display: inline-table; border-collapse: collapse;"> <tr><td style="width: 20px; height: 20px;"></td></tr> <tr><td style="width: 20px; height: 20px;"></td></tr> </table> </td> <td style="text-align: center;">-</td> <td style="text-align: center;"> <table border="1" style="display: inline-table; border-collapse: collapse;"> <tr><td style="width: 20px; height: 20px;"></td></tr> </table> </td> </tr> <tr> <td style="text-align: center;">D D</td> <td></td> <td style="text-align: center;">M M</td> <td></td> <td style="text-align: center;">Y Y Y Y</td> </tr> </table>         |  | <table border="1" style="display: inline-table; border-collapse: collapse;"> <tr><td style="width: 20px; height: 20px;"></td></tr> <tr><td style="width: 20px; height: 20px;"></td></tr> </table> |   |                                                                                                                                                                                                   | - | <table border="1" style="display: inline-table; border-collapse: collapse;"> <tr><td style="width: 20px; height: 20px;"></td></tr> <tr><td style="width: 20px; height: 20px;"></td></tr> </table> |   |                                                                                                                                                                                                                                                                                                               | - | <table border="1" style="display: inline-table; border-collapse: collapse;"> <tr><td style="width: 20px; height: 20px;"></td></tr> </table> |  |  |  |  | D D |  | M M |  | Y Y Y Y | <p><b>to</b></p> <table style="width: 100%; border: none;"> <tr> <td style="text-align: center;"> <table border="1" style="display: inline-table; border-collapse: collapse;"> <tr><td style="width: 20px; height: 20px;"></td></tr> <tr><td style="width: 20px; height: 20px;"></td></tr> </table> </td> <td style="text-align: center;">-</td> <td style="text-align: center;"> <table border="1" style="display: inline-table; border-collapse: collapse;"> <tr><td style="width: 20px; height: 20px;"></td></tr> <tr><td style="width: 20px; height: 20px;"></td></tr> </table> </td> <td style="text-align: center;">-</td> <td style="text-align: center;"> <table border="1" style="display: inline-table; border-collapse: collapse;"> <tr><td style="width: 20px; height: 20px;"></td></tr> </table> </td> </tr> <tr> <td style="text-align: center;">D D</td> <td></td> <td style="text-align: center;">M M</td> <td></td> <td style="text-align: center;">Y Y Y Y</td> </tr> </table> |  | <table border="1" style="display: inline-table; border-collapse: collapse;"> <tr><td style="width: 20px; height: 20px;"></td></tr> <tr><td style="width: 20px; height: 20px;"></td></tr> </table> |  |  | - | <table border="1" style="display: inline-table; border-collapse: collapse;"> <tr><td style="width: 20px; height: 20px;"></td></tr> <tr><td style="width: 20px; height: 20px;"></td></tr> </table> |  |  | - | <table border="1" style="display: inline-table; border-collapse: collapse;"> <tr><td style="width: 20px; height: 20px;"></td></tr> </table> |  |  |  |  | D D |  | M M |  | Y Y Y Y |
| <table border="1" style="display: inline-table; border-collapse: collapse;"> <tr><td style="width: 20px; height: 20px;"></td></tr> <tr><td style="width: 20px; height: 20px;"></td></tr> </table>                                                                                                                                                                                                                                                                                                                                                                                                                                                                                                                                                                                                                                                                                                                                                                                                                                                                                                                                                                            |  |                                                                                                                                                                                                   | - | <table border="1" style="display: inline-table; border-collapse: collapse;"> <tr><td style="width: 20px; height: 20px;"></td></tr> <tr><td style="width: 20px; height: 20px;"></td></tr> </table> |   |                                                                                                                                                                                                   | - | <table border="1" style="display: inline-table; border-collapse: collapse;"> <tr><td style="width: 20px; height: 20px;"></td></tr> </table> |   |                                                                                                                                                                                                                                                                                                               |  |  |  |  |     |  |     |  |         |                                                                                                                                                                                                                                                                                                                                                                                                                                                                                                                                                                                                                                                                                                                                                                                                                                                                                                                                                                                                                                                                                                                                                                    |  |                                                                                                                                                                                                   |  |  |   |                                                                                                                                                                                                   |  |  |   |                                                                                                                                                                                                                                                                                                               |  |  |  |  |     |  |     |  |         |
|                                                                                                                                                                                                                                                                                                                                                                                                                                                                                                                                                                                                                                                                                                                                                                                                                                                                                                                                                                                                                                                                                                                                                                              |  |                                                                                                                                                                                                   |   |                                                                                                                                                                                                   |   |                                                                                                                                                                                                   |   |                                                                                                                                                                                                                                                                                                               |   |                                                                                                                                                                                                                                                                                                               |  |  |  |  |     |  |     |  |         |                                                                                                                                                                                                                                                                                                                                                                                                                                                                                                                                                                                                                                                                                                                                                                                                                                                                                                                                                                                                                                                                                                                                                                    |  |                                                                                                                                                                                                   |  |  |   |                                                                                                                                                                                                   |  |  |   |                                                                                                                                                                                                                                                                                                               |  |  |  |  |     |  |     |  |         |
|                                                                                                                                                                                                                                                                                                                                                                                                                                                                                                                                                                                                                                                                                                                                                                                                                                                                                                                                                                                                                                                                                                                                                                              |  |                                                                                                                                                                                                   |   |                                                                                                                                                                                                   |   |                                                                                                                                                                                                   |   |                                                                                                                                                                                                                                                                                                               |   |                                                                                                                                                                                                                                                                                                               |  |  |  |  |     |  |     |  |         |                                                                                                                                                                                                                                                                                                                                                                                                                                                                                                                                                                                                                                                                                                                                                                                                                                                                                                                                                                                                                                                                                                                                                                    |  |                                                                                                                                                                                                   |  |  |   |                                                                                                                                                                                                   |  |  |   |                                                                                                                                                                                                                                                                                                               |  |  |  |  |     |  |     |  |         |
|                                                                                                                                                                                                                                                                                                                                                                                                                                                                                                                                                                                                                                                                                                                                                                                                                                                                                                                                                                                                                                                                                                                                                                              |  |                                                                                                                                                                                                   |   |                                                                                                                                                                                                   |   |                                                                                                                                                                                                   |   |                                                                                                                                                                                                                                                                                                               |   |                                                                                                                                                                                                                                                                                                               |  |  |  |  |     |  |     |  |         |                                                                                                                                                                                                                                                                                                                                                                                                                                                                                                                                                                                                                                                                                                                                                                                                                                                                                                                                                                                                                                                                                                                                                                    |  |                                                                                                                                                                                                   |  |  |   |                                                                                                                                                                                                   |  |  |   |                                                                                                                                                                                                                                                                                                               |  |  |  |  |     |  |     |  |         |
|                                                                                                                                                                                                                                                                                                                                                                                                                                                                                                                                                                                                                                                                                                                                                                                                                                                                                                                                                                                                                                                                                                                                                                              |  |                                                                                                                                                                                                   |   |                                                                                                                                                                                                   |   |                                                                                                                                                                                                   |   |                                                                                                                                                                                                                                                                                                               |   |                                                                                                                                                                                                                                                                                                               |  |  |  |  |     |  |     |  |         |                                                                                                                                                                                                                                                                                                                                                                                                                                                                                                                                                                                                                                                                                                                                                                                                                                                                                                                                                                                                                                                                                                                                                                    |  |                                                                                                                                                                                                   |  |  |   |                                                                                                                                                                                                   |  |  |   |                                                                                                                                                                                                                                                                                                               |  |  |  |  |     |  |     |  |         |
|                                                                                                                                                                                                                                                                                                                                                                                                                                                                                                                                                                                                                                                                                                                                                                                                                                                                                                                                                                                                                                                                                                                                                                              |  |                                                                                                                                                                                                   |   |                                                                                                                                                                                                   |   |                                                                                                                                                                                                   |   |                                                                                                                                                                                                                                                                                                               |   |                                                                                                                                                                                                                                                                                                               |  |  |  |  |     |  |     |  |         |                                                                                                                                                                                                                                                                                                                                                                                                                                                                                                                                                                                                                                                                                                                                                                                                                                                                                                                                                                                                                                                                                                                                                                    |  |                                                                                                                                                                                                   |  |  |   |                                                                                                                                                                                                   |  |  |   |                                                                                                                                                                                                                                                                                                               |  |  |  |  |     |  |     |  |         |
|                                                                                                                                                                                                                                                                                                                                                                                                                                                                                                                                                                                                                                                                                                                                                                                                                                                                                                                                                                                                                                                                                                                                                                              |  |                                                                                                                                                                                                   |   |                                                                                                                                                                                                   |   |                                                                                                                                                                                                   |   |                                                                                                                                                                                                                                                                                                               |   |                                                                                                                                                                                                                                                                                                               |  |  |  |  |     |  |     |  |         |                                                                                                                                                                                                                                                                                                                                                                                                                                                                                                                                                                                                                                                                                                                                                                                                                                                                                                                                                                                                                                                                                                                                                                    |  |                                                                                                                                                                                                   |  |  |   |                                                                                                                                                                                                   |  |  |   |                                                                                                                                                                                                                                                                                                               |  |  |  |  |     |  |     |  |         |
|                                                                                                                                                                                                                                                                                                                                                                                                                                                                                                                                                                                                                                                                                                                                                                                                                                                                                                                                                                                                                                                                                                                                                                              |  |                                                                                                                                                                                                   |   |                                                                                                                                                                                                   |   |                                                                                                                                                                                                   |   |                                                                                                                                                                                                                                                                                                               |   |                                                                                                                                                                                                                                                                                                               |  |  |  |  |     |  |     |  |         |                                                                                                                                                                                                                                                                                                                                                                                                                                                                                                                                                                                                                                                                                                                                                                                                                                                                                                                                                                                                                                                                                                                                                                    |  |                                                                                                                                                                                                   |  |  |   |                                                                                                                                                                                                   |  |  |   |                                                                                                                                                                                                                                                                                                               |  |  |  |  |     |  |     |  |         |
|                                                                                                                                                                                                                                                                                                                                                                                                                                                                                                                                                                                                                                                                                                                                                                                                                                                                                                                                                                                                                                                                                                                                                                              |  |                                                                                                                                                                                                   |   |                                                                                                                                                                                                   |   |                                                                                                                                                                                                   |   |                                                                                                                                                                                                                                                                                                               |   |                                                                                                                                                                                                                                                                                                               |  |  |  |  |     |  |     |  |         |                                                                                                                                                                                                                                                                                                                                                                                                                                                                                                                                                                                                                                                                                                                                                                                                                                                                                                                                                                                                                                                                                                                                                                    |  |                                                                                                                                                                                                   |  |  |   |                                                                                                                                                                                                   |  |  |   |                                                                                                                                                                                                                                                                                                               |  |  |  |  |     |  |     |  |         |
| D D                                                                                                                                                                                                                                                                                                                                                                                                                                                                                                                                                                                                                                                                                                                                                                                                                                                                                                                                                                                                                                                                                                                                                                          |  | M M                                                                                                                                                                                               |   | Y Y Y Y                                                                                                                                                                                           |   |                                                                                                                                                                                                   |   |                                                                                                                                                                                                                                                                                                               |   |                                                                                                                                                                                                                                                                                                               |  |  |  |  |     |  |     |  |         |                                                                                                                                                                                                                                                                                                                                                                                                                                                                                                                                                                                                                                                                                                                                                                                                                                                                                                                                                                                                                                                                                                                                                                    |  |                                                                                                                                                                                                   |  |  |   |                                                                                                                                                                                                   |  |  |   |                                                                                                                                                                                                                                                                                                               |  |  |  |  |     |  |     |  |         |
| <table border="1" style="display: inline-table; border-collapse: collapse;"> <tr><td style="width: 20px; height: 20px;"></td></tr> <tr><td style="width: 20px; height: 20px;"></td></tr> </table>                                                                                                                                                                                                                                                                                                                                                                                                                                                                                                                                                                                                                                                                                                                                                                                                                                                                                                                                                                            |  |                                                                                                                                                                                                   | - | <table border="1" style="display: inline-table; border-collapse: collapse;"> <tr><td style="width: 20px; height: 20px;"></td></tr> <tr><td style="width: 20px; height: 20px;"></td></tr> </table> |   |                                                                                                                                                                                                   | - | <table border="1" style="display: inline-table; border-collapse: collapse;"> <tr><td style="width: 20px; height: 20px;"></td></tr> </table> |   |                                                                                                                                                                                                                                                                                                               |  |  |  |  |     |  |     |  |         |                                                                                                                                                                                                                                                                                                                                                                                                                                                                                                                                                                                                                                                                                                                                                                                                                                                                                                                                                                                                                                                                                                                                                                    |  |                                                                                                                                                                                                   |  |  |   |                                                                                                                                                                                                   |  |  |   |                                                                                                                                                                                                                                                                                                               |  |  |  |  |     |  |     |  |         |
|                                                                                                                                                                                                                                                                                                                                                                                                                                                                                                                                                                                                                                                                                                                                                                                                                                                                                                                                                                                                                                                                                                                                                                              |  |                                                                                                                                                                                                   |   |                                                                                                                                                                                                   |   |                                                                                                                                                                                                   |   |                                                                                                                                                                                                                                                                                                               |   |                                                                                                                                                                                                                                                                                                               |  |  |  |  |     |  |     |  |         |                                                                                                                                                                                                                                                                                                                                                                                                                                                                                                                                                                                                                                                                                                                                                                                                                                                                                                                                                                                                                                                                                                                                                                    |  |                                                                                                                                                                                                   |  |  |   |                                                                                                                                                                                                   |  |  |   |                                                                                                                                                                                                                                                                                                               |  |  |  |  |     |  |     |  |         |
|                                                                                                                                                                                                                                                                                                                                                                                                                                                                                                                                                                                                                                                                                                                                                                                                                                                                                                                                                                                                                                                                                                                                                                              |  |                                                                                                                                                                                                   |   |                                                                                                                                                                                                   |   |                                                                                                                                                                                                   |   |                                                                                                                                                                                                                                                                                                               |   |                                                                                                                                                                                                                                                                                                               |  |  |  |  |     |  |     |  |         |                                                                                                                                                                                                                                                                                                                                                                                                                                                                                                                                                                                                                                                                                                                                                                                                                                                                                                                                                                                                                                                                                                                                                                    |  |                                                                                                                                                                                                   |  |  |   |                                                                                                                                                                                                   |  |  |   |                                                                                                                                                                                                                                                                                                               |  |  |  |  |     |  |     |  |         |
|                                                                                                                                                                                                                                                                                                                                                                                                                                                                                                                                                                                                                                                                                                                                                                                                                                                                                                                                                                                                                                                                                                                                                                              |  |                                                                                                                                                                                                   |   |                                                                                                                                                                                                   |   |                                                                                                                                                                                                   |   |                                                                                                                                                                                                                                                                                                               |   |                                                                                                                                                                                                                                                                                                               |  |  |  |  |     |  |     |  |         |                                                                                                                                                                                                                                                                                                                                                                                                                                                                                                                                                                                                                                                                                                                                                                                                                                                                                                                                                                                                                                                                                                                                                                    |  |                                                                                                                                                                                                   |  |  |   |                                                                                                                                                                                                   |  |  |   |                                                                                                                                                                                                                                                                                                               |  |  |  |  |     |  |     |  |         |
|                                                                                                                                                                                                                                                                                                                                                                                                                                                                                                                                                                                                                                                                                                                                                                                                                                                                                                                                                                                                                                                                                                                                                                              |  |                                                                                                                                                                                                   |   |                                                                                                                                                                                                   |   |                                                                                                                                                                                                   |   |                                                                                                                                                                                                                                                                                                               |   |                                                                                                                                                                                                                                                                                                               |  |  |  |  |     |  |     |  |         |                                                                                                                                                                                                                                                                                                                                                                                                                                                                                                                                                                                                                                                                                                                                                                                                                                                                                                                                                                                                                                                                                                                                                                    |  |                                                                                                                                                                                                   |  |  |   |                                                                                                                                                                                                   |  |  |   |                                                                                                                                                                                                                                                                                                               |  |  |  |  |     |  |     |  |         |
|                                                                                                                                                                                                                                                                                                                                                                                                                                                                                                                                                                                                                                                                                                                                                                                                                                                                                                                                                                                                                                                                                                                                                                              |  |                                                                                                                                                                                                   |   |                                                                                                                                                                                                   |   |                                                                                                                                                                                                   |   |                                                                                                                                                                                                                                                                                                               |   |                                                                                                                                                                                                                                                                                                               |  |  |  |  |     |  |     |  |         |                                                                                                                                                                                                                                                                                                                                                                                                                                                                                                                                                                                                                                                                                                                                                                                                                                                                                                                                                                                                                                                                                                                                                                    |  |                                                                                                                                                                                                   |  |  |   |                                                                                                                                                                                                   |  |  |   |                                                                                                                                                                                                                                                                                                               |  |  |  |  |     |  |     |  |         |
|                                                                                                                                                                                                                                                                                                                                                                                                                                                                                                                                                                                                                                                                                                                                                                                                                                                                                                                                                                                                                                                                                                                                                                              |  |                                                                                                                                                                                                   |   |                                                                                                                                                                                                   |   |                                                                                                                                                                                                   |   |                                                                                                                                                                                                                                                                                                               |   |                                                                                                                                                                                                                                                                                                               |  |  |  |  |     |  |     |  |         |                                                                                                                                                                                                                                                                                                                                                                                                                                                                                                                                                                                                                                                                                                                                                                                                                                                                                                                                                                                                                                                                                                                                                                    |  |                                                                                                                                                                                                   |  |  |   |                                                                                                                                                                                                   |  |  |   |                                                                                                                                                                                                                                                                                                               |  |  |  |  |     |  |     |  |         |
|                                                                                                                                                                                                                                                                                                                                                                                                                                                                                                                                                                                                                                                                                                                                                                                                                                                                                                                                                                                                                                                                                                                                                                              |  |                                                                                                                                                                                                   |   |                                                                                                                                                                                                   |   |                                                                                                                                                                                                   |   |                                                                                                                                                                                                                                                                                                               |   |                                                                                                                                                                                                                                                                                                               |  |  |  |  |     |  |     |  |         |                                                                                                                                                                                                                                                                                                                                                                                                                                                                                                                                                                                                                                                                                                                                                                                                                                                                                                                                                                                                                                                                                                                                                                    |  |                                                                                                                                                                                                   |  |  |   |                                                                                                                                                                                                   |  |  |   |                                                                                                                                                                                                                                                                                                               |  |  |  |  |     |  |     |  |         |
|                                                                                                                                                                                                                                                                                                                                                                                                                                                                                                                                                                                                                                                                                                                                                                                                                                                                                                                                                                                                                                                                                                                                                                              |  |                                                                                                                                                                                                   |   |                                                                                                                                                                                                   |   |                                                                                                                                                                                                   |   |                                                                                                                                                                                                                                                                                                               |   |                                                                                                                                                                                                                                                                                                               |  |  |  |  |     |  |     |  |         |                                                                                                                                                                                                                                                                                                                                                                                                                                                                                                                                                                                                                                                                                                                                                                                                                                                                                                                                                                                                                                                                                                                                                                    |  |                                                                                                                                                                                                   |  |  |   |                                                                                                                                                                                                   |  |  |   |                                                                                                                                                                                                                                                                                                               |  |  |  |  |     |  |     |  |         |
| D D                                                                                                                                                                                                                                                                                                                                                                                                                                                                                                                                                                                                                                                                                                                                                                                                                                                                                                                                                                                                                                                                                                                                                                          |  | M M                                                                                                                                                                                               |   | Y Y Y Y                                                                                                                                                                                           |   |                                                                                                                                                                                                   |   |                                                                                                                                                                                                                                                                                                               |   |                                                                                                                                                                                                                                                                                                               |  |  |  |  |     |  |     |  |         |                                                                                                                                                                                                                                                                                                                                                                                                                                                                                                                                                                                                                                                                                                                                                                                                                                                                                                                                                                                                                                                                                                                                                                    |  |                                                                                                                                                                                                   |  |  |   |                                                                                                                                                                                                   |  |  |   |                                                                                                                                                                                                                                                                                                               |  |  |  |  |     |  |     |  |         |
| <p><b>Co-payment:</b> _____</p>                                                                                                                                                                                                                                                                                                                                                                                                                                                                                                                                                                                                                                                                                                                                                                                                                                                                                                                                                                                                                                                                                                                                              |  |                                                                                                                                                                                                   |   |                                                                                                                                                                                                   |   |                                                                                                                                                                                                   |   |                                                                                                                                                                                                                                                                                                               |   |                                                                                                                                                                                                                                                                                                               |  |  |  |  |     |  |     |  |         |                                                                                                                                                                                                                                                                                                                                                                                                                                                                                                                                                                                                                                                                                                                                                                                                                                                                                                                                                                                                                                                                                                                                                                    |  |                                                                                                                                                                                                   |  |  |   |                                                                                                                                                                                                   |  |  |   |                                                                                                                                                                                                                                                                                                               |  |  |  |  |     |  |     |  |         |
| <p><b>from</b></p> <table style="width: 100%; border: none;"> <tr> <td style="text-align: center;"> <table border="1" style="display: inline-table; border-collapse: collapse;"> <tr><td style="width: 20px; height: 20px;"></td></tr> <tr><td style="width: 20px; height: 20px;"></td></tr> </table> </td> <td style="text-align: center;">-</td> <td style="text-align: center;"> <table border="1" style="display: inline-table; border-collapse: collapse;"> <tr><td style="width: 20px; height: 20px;"></td></tr> <tr><td style="width: 20px; height: 20px;"></td></tr> </table> </td> <td style="text-align: center;">-</td> <td style="text-align: center;"> <table border="1" style="display: inline-table; border-collapse: collapse;"> <tr><td style="width: 20px; height: 20px;"></td></tr> </table> </td> </tr> <tr> <td style="text-align: center;">D D</td> <td></td> <td style="text-align: center;">M M</td> <td></td> <td style="text-align: center;">Y Y Y Y</td> </tr> </table>         |  | <table border="1" style="display: inline-table; border-collapse: collapse;"> <tr><td style="width: 20px; height: 20px;"></td></tr> <tr><td style="width: 20px; height: 20px;"></td></tr> </table> |   |                                                                                                                                                                                                   | - | <table border="1" style="display: inline-table; border-collapse: collapse;"> <tr><td style="width: 20px; height: 20px;"></td></tr> <tr><td style="width: 20px; height: 20px;"></td></tr> </table> |   |                                                                                                                                                                                                                                                                                                               | - | <table border="1" style="display: inline-table; border-collapse: collapse;"> <tr><td style="width: 20px; height: 20px;"></td></tr> </table> |  |  |  |  | D D |  | M M |  | Y Y Y Y | <p><b>to</b></p> <table style="width: 100%; border: none;"> <tr> <td style="text-align: center;"> <table border="1" style="display: inline-table; border-collapse: collapse;"> <tr><td style="width: 20px; height: 20px;"></td></tr> <tr><td style="width: 20px; height: 20px;"></td></tr> </table> </td> <td style="text-align: center;">-</td> <td style="text-align: center;"> <table border="1" style="display: inline-table; border-collapse: collapse;"> <tr><td style="width: 20px; height: 20px;"></td></tr> <tr><td style="width: 20px; height: 20px;"></td></tr> </table> </td> <td style="text-align: center;">-</td> <td style="text-align: center;"> <table border="1" style="display: inline-table; border-collapse: collapse;"> <tr><td style="width: 20px; height: 20px;"></td></tr> </table> </td> </tr> <tr> <td style="text-align: center;">D D</td> <td></td> <td style="text-align: center;">M M</td> <td></td> <td style="text-align: center;">Y Y Y Y</td> </tr> </table> |  | <table border="1" style="display: inline-table; border-collapse: collapse;"> <tr><td style="width: 20px; height: 20px;"></td></tr> <tr><td style="width: 20px; height: 20px;"></td></tr> </table> |  |  | - | <table border="1" style="display: inline-table; border-collapse: collapse;"> <tr><td style="width: 20px; height: 20px;"></td></tr> <tr><td style="width: 20px; height: 20px;"></td></tr> </table> |  |  | - | <table border="1" style="display: inline-table; border-collapse: collapse;"> <tr><td style="width: 20px; height: 20px;"></td></tr> </table> |  |  |  |  | D D |  | M M |  | Y Y Y Y |
| <table border="1" style="display: inline-table; border-collapse: collapse;"> <tr><td style="width: 20px; height: 20px;"></td></tr> <tr><td style="width: 20px; height: 20px;"></td></tr> </table>                                                                                                                                                                                                                                                                                                                                                                                                                                                                                                                                                                                                                                                                                                                                                                                                                                                                                                                                                                            |  |                                                                                                                                                                                                   | - | <table border="1" style="display: inline-table; border-collapse: collapse;"> <tr><td style="width: 20px; height: 20px;"></td></tr> <tr><td style="width: 20px; height: 20px;"></td></tr> </table> |   |                                                                                                                                                                                                   | - | <table border="1" style="display: inline-table; border-collapse: collapse;"> <tr><td style="width: 20px; height: 20px;"></td></tr> </table> |   |                                                                                                                                                                                                                                                                                                               |  |  |  |  |     |  |     |  |         |                                                                                                                                                                                                                                                                                                                                                                                                                                                                                                                                                                                                                                                                                                                                                                                                                                                                                                                                                                                                                                                                                                                                                                    |  |                                                                                                                                                                                                   |  |  |   |                                                                                                                                                                                                   |  |  |   |                                                                                                                                                                                                                                                                                                               |  |  |  |  |     |  |     |  |         |
|                                                                                                                                                                                                                                                                                                                                                                                                                                                                                                                                                                                                                                                                                                                                                                                                                                                                                                                                                                                                                                                                                                                                                                              |  |                                                                                                                                                                                                   |   |                                                                                                                                                                                                   |   |                                                                                                                                                                                                   |   |                                                                                                                                                                                                                                                                                                               |   |                                                                                                                                                                                                                                                                                                               |  |  |  |  |     |  |     |  |         |                                                                                                                                                                                                                                                                                                                                                                                                                                                                                                                                                                                                                                                                                                                                                                                                                                                                                                                                                                                                                                                                                                                                                                    |  |                                                                                                                                                                                                   |  |  |   |                                                                                                                                                                                                   |  |  |   |                                                                                                                                                                                                                                                                                                               |  |  |  |  |     |  |     |  |         |
|                                                                                                                                                                                                                                                                                                                                                                                                                                                                                                                                                                                                                                                                                                                                                                                                                                                                                                                                                                                                                                                                                                                                                                              |  |                                                                                                                                                                                                   |   |                                                                                                                                                                                                   |   |                                                                                                                                                                                                   |   |                                                                                                                                                                                                                                                                                                               |   |                                                                                                                                                                                                                                                                                                               |  |  |  |  |     |  |     |  |         |                                                                                                                                                                                                                                                                                                                                                                                                                                                                                                                                                                                                                                                                                                                                                                                                                                                                                                                                                                                                                                                                                                                                                                    |  |                                                                                                                                                                                                   |  |  |   |                                                                                                                                                                                                   |  |  |   |                                                                                                                                                                                                                                                                                                               |  |  |  |  |     |  |     |  |         |
|                                                                                                                                                                                                                                                                                                                                                                                                                                                                                                                                                                                                                                                                                                                                                                                                                                                                                                                                                                                                                                                                                                                                                                              |  |                                                                                                                                                                                                   |   |                                                                                                                                                                                                   |   |                                                                                                                                                                                                   |   |                                                                                                                                                                                                                                                                                                               |   |                                                                                                                                                                                                                                                                                                               |  |  |  |  |     |  |     |  |         |                                                                                                                                                                                                                                                                                                                                                                                                                                                                                                                                                                                                                                                                                                                                                                                                                                                                                                                                                                                                                                                                                                                                                                    |  |                                                                                                                                                                                                   |  |  |   |                                                                                                                                                                                                   |  |  |   |                                                                                                                                                                                                                                                                                                               |  |  |  |  |     |  |     |  |         |
|                                                                                                                                                                                                                                                                                                                                                                                                                                                                                                                                                                                                                                                                                                                                                                                                                                                                                                                                                                                                                                                                                                                                                                              |  |                                                                                                                                                                                                   |   |                                                                                                                                                                                                   |   |                                                                                                                                                                                                   |   |                                                                                                                                                                                                                                                                                                               |   |                                                                                                                                                                                                                                                                                                               |  |  |  |  |     |  |     |  |         |                                                                                                                                                                                                                                                                                                                                                                                                                                                                                                                                                                                                                                                                                                                                                                                                                                                                                                                                                                                                                                                                                                                                                                    |  |                                                                                                                                                                                                   |  |  |   |                                                                                                                                                                                                   |  |  |   |                                                                                                                                                                                                                                                                                                               |  |  |  |  |     |  |     |  |         |
|                                                                                                                                                                                                                                                                                                                                                                                                                                                                                                                                                                                                                                                                                                                                                                                                                                                                                                                                                                                                                                                                                                                                                                              |  |                                                                                                                                                                                                   |   |                                                                                                                                                                                                   |   |                                                                                                                                                                                                   |   |                                                                                                                                                                                                                                                                                                               |   |                                                                                                                                                                                                                                                                                                               |  |  |  |  |     |  |     |  |         |                                                                                                                                                                                                                                                                                                                                                                                                                                                                                                                                                                                                                                                                                                                                                                                                                                                                                                                                                                                                                                                                                                                                                                    |  |                                                                                                                                                                                                   |  |  |   |                                                                                                                                                                                                   |  |  |   |                                                                                                                                                                                                                                                                                                               |  |  |  |  |     |  |     |  |         |
|                                                                                                                                                                                                                                                                                                                                                                                                                                                                                                                                                                                                                                                                                                                                                                                                                                                                                                                                                                                                                                                                                                                                                                              |  |                                                                                                                                                                                                   |   |                                                                                                                                                                                                   |   |                                                                                                                                                                                                   |   |                                                                                                                                                                                                                                                                                                               |   |                                                                                                                                                                                                                                                                                                               |  |  |  |  |     |  |     |  |         |                                                                                                                                                                                                                                                                                                                                                                                                                                                                                                                                                                                                                                                                                                                                                                                                                                                                                                                                                                                                                                                                                                                                                                    |  |                                                                                                                                                                                                   |  |  |   |                                                                                                                                                                                                   |  |  |   |                                                                                                                                                                                                                                                                                                               |  |  |  |  |     |  |     |  |         |
|                                                                                                                                                                                                                                                                                                                                                                                                                                                                                                                                                                                                                                                                                                                                                                                                                                                                                                                                                                                                                                                                                                                                                                              |  |                                                                                                                                                                                                   |   |                                                                                                                                                                                                   |   |                                                                                                                                                                                                   |   |                                                                                                                                                                                                                                                                                                               |   |                                                                                                                                                                                                                                                                                                               |  |  |  |  |     |  |     |  |         |                                                                                                                                                                                                                                                                                                                                                                                                                                                                                                                                                                                                                                                                                                                                                                                                                                                                                                                                                                                                                                                                                                                                                                    |  |                                                                                                                                                                                                   |  |  |   |                                                                                                                                                                                                   |  |  |   |                                                                                                                                                                                                                                                                                                               |  |  |  |  |     |  |     |  |         |
|                                                                                                                                                                                                                                                                                                                                                                                                                                                                                                                                                                                                                                                                                                                                                                                                                                                                                                                                                                                                                                                                                                                                                                              |  |                                                                                                                                                                                                   |   |                                                                                                                                                                                                   |   |                                                                                                                                                                                                   |   |                                                                                                                                                                                                                                                                                                               |   |                                                                                                                                                                                                                                                                                                               |  |  |  |  |     |  |     |  |         |                                                                                                                                                                                                                                                                                                                                                                                                                                                                                                                                                                                                                                                                                                                                                                                                                                                                                                                                                                                                                                                                                                                                                                    |  |                                                                                                                                                                                                   |  |  |   |                                                                                                                                                                                                   |  |  |   |                                                                                                                                                                                                                                                                                                               |  |  |  |  |     |  |     |  |         |
| D D                                                                                                                                                                                                                                                                                                                                                                                                                                                                                                                                                                                                                                                                                                                                                                                                                                                                                                                                                                                                                                                                                                                                                                          |  | M M                                                                                                                                                                                               |   | Y Y Y Y                                                                                                                                                                                           |   |                                                                                                                                                                                                   |   |                                                                                                                                                                                                                                                                                                               |   |                                                                                                                                                                                                                                                                                                               |  |  |  |  |     |  |     |  |         |                                                                                                                                                                                                                                                                                                                                                                                                                                                                                                                                                                                                                                                                                                                                                                                                                                                                                                                                                                                                                                                                                                                                                                    |  |                                                                                                                                                                                                   |  |  |   |                                                                                                                                                                                                   |  |  |   |                                                                                                                                                                                                                                                                                                               |  |  |  |  |     |  |     |  |         |
| <table border="1" style="display: inline-table; border-collapse: collapse;"> <tr><td style="width: 20px; height: 20px;"></td></tr> <tr><td style="width: 20px; height: 20px;"></td></tr> </table>                                                                                                                                                                                                                                                                                                                                                                                                                                                                                                                                                                                                                                                                                                                                                                                                                                                                                                                                                                            |  |                                                                                                                                                                                                   | - | <table border="1" style="display: inline-table; border-collapse: collapse;"> <tr><td style="width: 20px; height: 20px;"></td></tr> <tr><td style="width: 20px; height: 20px;"></td></tr> </table> |   |                                                                                                                                                                                                   | - | <table border="1" style="display: inline-table; border-collapse: collapse;"> <tr><td style="width: 20px; height: 20px;"></td></tr> </table> |   |                                                                                                                                                                                                                                                                                                               |  |  |  |  |     |  |     |  |         |                                                                                                                                                                                                                                                                                                                                                                                                                                                                                                                                                                                                                                                                                                                                                                                                                                                                                                                                                                                                                                                                                                                                                                    |  |                                                                                                                                                                                                   |  |  |   |                                                                                                                                                                                                   |  |  |   |                                                                                                                                                                                                                                                                                                               |  |  |  |  |     |  |     |  |         |
|                                                                                                                                                                                                                                                                                                                                                                                                                                                                                                                                                                                                                                                                                                                                                                                                                                                                                                                                                                                                                                                                                                                                                                              |  |                                                                                                                                                                                                   |   |                                                                                                                                                                                                   |   |                                                                                                                                                                                                   |   |                                                                                                                                                                                                                                                                                                               |   |                                                                                                                                                                                                                                                                                                               |  |  |  |  |     |  |     |  |         |                                                                                                                                                                                                                                                                                                                                                                                                                                                                                                                                                                                                                                                                                                                                                                                                                                                                                                                                                                                                                                                                                                                                                                    |  |                                                                                                                                                                                                   |  |  |   |                                                                                                                                                                                                   |  |  |   |                                                                                                                                                                                                                                                                                                               |  |  |  |  |     |  |     |  |         |
|                                                                                                                                                                                                                                                                                                                                                                                                                                                                                                                                                                                                                                                                                                                                                                                                                                                                                                                                                                                                                                                                                                                                                                              |  |                                                                                                                                                                                                   |   |                                                                                                                                                                                                   |   |                                                                                                                                                                                                   |   |                                                                                                                                                                                                                                                                                                               |   |                                                                                                                                                                                                                                                                                                               |  |  |  |  |     |  |     |  |         |                                                                                                                                                                                                                                                                                                                                                                                                                                                                                                                                                                                                                                                                                                                                                                                                                                                                                                                                                                                                                                                                                                                                                                    |  |                                                                                                                                                                                                   |  |  |   |                                                                                                                                                                                                   |  |  |   |                                                                                                                                                                                                                                                                                                               |  |  |  |  |     |  |     |  |         |
|                                                                                                                                                                                                                                                                                                                                                                                                                                                                                                                                                                                                                                                                                                                                                                                                                                                                                                                                                                                                                                                                                                                                                                              |  |                                                                                                                                                                                                   |   |                                                                                                                                                                                                   |   |                                                                                                                                                                                                   |   |                                                                                                                                                                                                                                                                                                               |   |                                                                                                                                                                                                                                                                                                               |  |  |  |  |     |  |     |  |         |                                                                                                                                                                                                                                                                                                                                                                                                                                                                                                                                                                                                                                                                                                                                                                                                                                                                                                                                                                                                                                                                                                                                                                    |  |                                                                                                                                                                                                   |  |  |   |                                                                                                                                                                                                   |  |  |   |                                                                                                                                                                                                                                                                                                               |  |  |  |  |     |  |     |  |         |
|                                                                                                                                                                                                                                                                                                                                                                                                                                                                                                                                                                                                                                                                                                                                                                                                                                                                                                                                                                                                                                                                                                                                                                              |  |                                                                                                                                                                                                   |   |                                                                                                                                                                                                   |   |                                                                                                                                                                                                   |   |                                                                                                                                                                                                                                                                                                               |   |                                                                                                                                                                                                                                                                                                               |  |  |  |  |     |  |     |  |         |                                                                                                                                                                                                                                                                                                                                                                                                                                                                                                                                                                                                                                                                                                                                                                                                                                                                                                                                                                                                                                                                                                                                                                    |  |                                                                                                                                                                                                   |  |  |   |                                                                                                                                                                                                   |  |  |   |                                                                                                                                                                                                                                                                                                               |  |  |  |  |     |  |     |  |         |
|                                                                                                                                                                                                                                                                                                                                                                                                                                                                                                                                                                                                                                                                                                                                                                                                                                                                                                                                                                                                                                                                                                                                                                              |  |                                                                                                                                                                                                   |   |                                                                                                                                                                                                   |   |                                                                                                                                                                                                   |   |                                                                                                                                                                                                                                                                                                               |   |                                                                                                                                                                                                                                                                                                               |  |  |  |  |     |  |     |  |         |                                                                                                                                                                                                                                                                                                                                                                                                                                                                                                                                                                                                                                                                                                                                                                                                                                                                                                                                                                                                                                                                                                                                                                    |  |                                                                                                                                                                                                   |  |  |   |                                                                                                                                                                                                   |  |  |   |                                                                                                                                                                                                                                                                                                               |  |  |  |  |     |  |     |  |         |
|                                                                                                                                                                                                                                                                                                                                                                                                                                                                                                                                                                                                                                                                                                                                                                                                                                                                                                                                                                                                                                                                                                                                                                              |  |                                                                                                                                                                                                   |   |                                                                                                                                                                                                   |   |                                                                                                                                                                                                   |   |                                                                                                                                                                                                                                                                                                               |   |                                                                                                                                                                                                                                                                                                               |  |  |  |  |     |  |     |  |         |                                                                                                                                                                                                                                                                                                                                                                                                                                                                                                                                                                                                                                                                                                                                                                                                                                                                                                                                                                                                                                                                                                                                                                    |  |                                                                                                                                                                                                   |  |  |   |                                                                                                                                                                                                   |  |  |   |                                                                                                                                                                                                                                                                                                               |  |  |  |  |     |  |     |  |         |
|                                                                                                                                                                                                                                                                                                                                                                                                                                                                                                                                                                                                                                                                                                                                                                                                                                                                                                                                                                                                                                                                                                                                                                              |  |                                                                                                                                                                                                   |   |                                                                                                                                                                                                   |   |                                                                                                                                                                                                   |   |                                                                                                                                                                                                                                                                                                               |   |                                                                                                                                                                                                                                                                                                               |  |  |  |  |     |  |     |  |         |                                                                                                                                                                                                                                                                                                                                                                                                                                                                                                                                                                                                                                                                                                                                                                                                                                                                                                                                                                                                                                                                                                                                                                    |  |                                                                                                                                                                                                   |  |  |   |                                                                                                                                                                                                   |  |  |   |                                                                                                                                                                                                                                                                                                               |  |  |  |  |     |  |     |  |         |
|                                                                                                                                                                                                                                                                                                                                                                                                                                                                                                                                                                                                                                                                                                                                                                                                                                                                                                                                                                                                                                                                                                                                                                              |  |                                                                                                                                                                                                   |   |                                                                                                                                                                                                   |   |                                                                                                                                                                                                   |   |                                                                                                                                                                                                                                                                                                               |   |                                                                                                                                                                                                                                                                                                               |  |  |  |  |     |  |     |  |         |                                                                                                                                                                                                                                                                                                                                                                                                                                                                                                                                                                                                                                                                                                                                                                                                                                                                                                                                                                                                                                                                                                                                                                    |  |                                                                                                                                                                                                   |  |  |   |                                                                                                                                                                                                   |  |  |   |                                                                                                                                                                                                                                                                                                               |  |  |  |  |     |  |     |  |         |
| D D                                                                                                                                                                                                                                                                                                                                                                                                                                                                                                                                                                                                                                                                                                                                                                                                                                                                                                                                                                                                                                                                                                                                                                          |  | M M                                                                                                                                                                                               |   | Y Y Y Y                                                                                                                                                                                           |   |                                                                                                                                                                                                   |   |                                                                                                                                                                                                                                                                                                               |   |                                                                                                                                                                                                                                                                                                               |  |  |  |  |     |  |     |  |         |                                                                                                                                                                                                                                                                                                                                                                                                                                                                                                                                                                                                                                                                                                                                                                                                                                                                                                                                                                                                                                                                                                                                                                    |  |                                                                                                                                                                                                   |  |  |   |                                                                                                                                                                                                   |  |  |   |                                                                                                                                                                                                                                                                                                               |  |  |  |  |     |  |     |  |         |
| <p><b>Co-payment:</b> _____</p>                                                                                                                                                                                                                                                                                                                                                                                                                                                                                                                                                                                                                                                                                                                                                                                                                                                                                                                                                                                                                                                                                                                                              |  |                                                                                                                                                                                                   |   |                                                                                                                                                                                                   |   |                                                                                                                                                                                                   |   |                                                                                                                                                                                                                                                                                                               |   |                                                                                                                                                                                                                                                                                                               |  |  |  |  |     |  |     |  |         |                                                                                                                                                                                                                                                                                                                                                                                                                                                                                                                                                                                                                                                                                                                                                                                                                                                                                                                                                                                                                                                                                                                                                                    |  |                                                                                                                                                                                                   |  |  |   |                                                                                                                                                                                                   |  |  |   |                                                                                                                                                                                                                                                                                                               |  |  |  |  |     |  |     |  |         |
| <p><input type="radio"/> Rehabilitation facility</p>                                                                                                                                                                                                                                                                                                                                                                                                                                                                                                                                                                                                                                                                                                                                                                                                                                                                                                                                                                                                                                                                                                                         |  |                                                                                                                                                                                                   |   |                                                                                                                                                                                                   |   |                                                                                                                                                                                                   |   |                                                                                                                                                                                                                                                                                                               |   |                                                                                                                                                                                                                                                                                                               |  |  |  |  |     |  |     |  |         |                                                                                                                                                                                                                                                                                                                                                                                                                                                                                                                                                                                                                                                                                                                                                                                                                                                                                                                                                                                                                                                                                                                                                                    |  |                                                                                                                                                                                                   |  |  |   |                                                                                                                                                                                                   |  |  |   |                                                                                                                                                                                                                                                                                                               |  |  |  |  |     |  |     |  |         |
| <p><i>If yes, from</i></p> <table style="width: 100%; border: none;"> <tr> <td style="text-align: center;"> <table border="1" style="display: inline-table; border-collapse: collapse;"> <tr><td style="width: 20px; height: 20px;"></td></tr> <tr><td style="width: 20px; height: 20px;"></td></tr> </table> </td> <td style="text-align: center;">-</td> <td style="text-align: center;"> <table border="1" style="display: inline-table; border-collapse: collapse;"> <tr><td style="width: 20px; height: 20px;"></td></tr> <tr><td style="width: 20px; height: 20px;"></td></tr> </table> </td> <td style="text-align: center;">-</td> <td style="text-align: center;"> <table border="1" style="display: inline-table; border-collapse: collapse;"> <tr><td style="width: 20px; height: 20px;"></td></tr> </table> </td> </tr> <tr> <td style="text-align: center;">D D</td> <td></td> <td style="text-align: center;">M M</td> <td></td> <td style="text-align: center;">Y Y Y Y</td> </tr> </table> |  | <table border="1" style="display: inline-table; border-collapse: collapse;"> <tr><td style="width: 20px; height: 20px;"></td></tr> <tr><td style="width: 20px; height: 20px;"></td></tr> </table> |   |                                                                                                                                                                                                   | - | <table border="1" style="display: inline-table; border-collapse: collapse;"> <tr><td style="width: 20px; height: 20px;"></td></tr> <tr><td style="width: 20px; height: 20px;"></td></tr> </table> |   |                                                                                                                                                                                                                                                                                                               | - | <table border="1" style="display: inline-table; border-collapse: collapse;"> <tr><td style="width: 20px; height: 20px;"></td></tr> </table> |  |  |  |  | D D |  | M M |  | Y Y Y Y | <p><i>to</i></p> <table style="width: 100%; border: none;"> <tr> <td style="text-align: center;"> <table border="1" style="display: inline-table; border-collapse: collapse;"> <tr><td style="width: 20px; height: 20px;"></td></tr> <tr><td style="width: 20px; height: 20px;"></td></tr> </table> </td> <td style="text-align: center;">-</td> <td style="text-align: center;"> <table border="1" style="display: inline-table; border-collapse: collapse;"> <tr><td style="width: 20px; height: 20px;"></td></tr> <tr><td style="width: 20px; height: 20px;"></td></tr> </table> </td> <td style="text-align: center;">-</td> <td style="text-align: center;"> <table border="1" style="display: inline-table; border-collapse: collapse;"> <tr><td style="width: 20px; height: 20px;"></td></tr> </table> </td> </tr> <tr> <td style="text-align: center;">D D</td> <td></td> <td style="text-align: center;">M M</td> <td></td> <td style="text-align: center;">Y Y Y Y</td> </tr> </table> |  | <table border="1" style="display: inline-table; border-collapse: collapse;"> <tr><td style="width: 20px; height: 20px;"></td></tr> <tr><td style="width: 20px; height: 20px;"></td></tr> </table> |  |  | - | <table border="1" style="display: inline-table; border-collapse: collapse;"> <tr><td style="width: 20px; height: 20px;"></td></tr> <tr><td style="width: 20px; height: 20px;"></td></tr> </table> |  |  | - | <table border="1" style="display: inline-table; border-collapse: collapse;"> <tr><td style="width: 20px; height: 20px;"></td></tr> </table> |  |  |  |  | D D |  | M M |  | Y Y Y Y |
| <table border="1" style="display: inline-table; border-collapse: collapse;"> <tr><td style="width: 20px; height: 20px;"></td></tr> <tr><td style="width: 20px; height: 20px;"></td></tr> </table>                                                                                                                                                                                                                                                                                                                                                                                                                                                                                                                                                                                                                                                                                                                                                                                                                                                                                                                                                                            |  |                                                                                                                                                                                                   | - | <table border="1" style="display: inline-table; border-collapse: collapse;"> <tr><td style="width: 20px; height: 20px;"></td></tr> <tr><td style="width: 20px; height: 20px;"></td></tr> </table> |   |                                                                                                                                                                                                   | - | <table border="1" style="display: inline-table; border-collapse: collapse;"> <tr><td style="width: 20px; height: 20px;"></td></tr> </table> |   |                                                                                                                                                                                                                                                                                                               |  |  |  |  |     |  |     |  |         |                                                                                                                                                                                                                                                                                                                                                                                                                                                                                                                                                                                                                                                                                                                                                                                                                                                                                                                                                                                                                                                                                                                                                                    |  |                                                                                                                                                                                                   |  |  |   |                                                                                                                                                                                                   |  |  |   |                                                                                                                                                                                                                                                                                                               |  |  |  |  |     |  |     |  |         |
|                                                                                                                                                                                                                                                                                                                                                                                                                                                                                                                                                                                                                                                                                                                                                                                                                                                                                                                                                                                                                                                                                                                                                                              |  |                                                                                                                                                                                                   |   |                                                                                                                                                                                                   |   |                                                                                                                                                                                                   |   |                                                                                                                                                                                                                                                                                                               |   |                                                                                                                                                                                                                                                                                                               |  |  |  |  |     |  |     |  |         |                                                                                                                                                                                                                                                                                                                                                                                                                                                                                                                                                                                                                                                                                                                                                                                                                                                                                                                                                                                                                                                                                                                                                                    |  |                                                                                                                                                                                                   |  |  |   |                                                                                                                                                                                                   |  |  |   |                                                                                                                                                                                                                                                                                                               |  |  |  |  |     |  |     |  |         |
|                                                                                                                                                                                                                                                                                                                                                                                                                                                                                                                                                                                                                                                                                                                                                                                                                                                                                                                                                                                                                                                                                                                                                                              |  |                                                                                                                                                                                                   |   |                                                                                                                                                                                                   |   |                                                                                                                                                                                                   |   |                                                                                                                                                                                                                                                                                                               |   |                                                                                                                                                                                                                                                                                                               |  |  |  |  |     |  |     |  |         |                                                                                                                                                                                                                                                                                                                                                                                                                                                                                                                                                                                                                                                                                                                                                                                                                                                                                                                                                                                                                                                                                                                                                                    |  |                                                                                                                                                                                                   |  |  |   |                                                                                                                                                                                                   |  |  |   |                                                                                                                                                                                                                                                                                                               |  |  |  |  |     |  |     |  |         |
|                                                                                                                                                                                                                                                                                                                                                                                                                                                                                                                                                                                                                                                                                                                                                                                                                                                                                                                                                                                                                                                                                                                                                                              |  |                                                                                                                                                                                                   |   |                                                                                                                                                                                                   |   |                                                                                                                                                                                                   |   |                                                                                                                                                                                                                                                                                                               |   |                                                                                                                                                                                                                                                                                                               |  |  |  |  |     |  |     |  |         |                                                                                                                                                                                                                                                                                                                                                                                                                                                                                                                                                                                                                                                                                                                                                                                                                                                                                                                                                                                                                                                                                                                                                                    |  |                                                                                                                                                                                                   |  |  |   |                                                                                                                                                                                                   |  |  |   |                                                                                                                                                                                                                                                                                                               |  |  |  |  |     |  |     |  |         |
|                                                                                                                                                                                                                                                                                                                                                                                                                                                                                                                                                                                                                                                                                                                                                                                                                                                                                                                                                                                                                                                                                                                                                                              |  |                                                                                                                                                                                                   |   |                                                                                                                                                                                                   |   |                                                                                                                                                                                                   |   |                                                                                                                                                                                                                                                                                                               |   |                                                                                                                                                                                                                                                                                                               |  |  |  |  |     |  |     |  |         |                                                                                                                                                                                                                                                                                                                                                                                                                                                                                                                                                                                                                                                                                                                                                                                                                                                                                                                                                                                                                                                                                                                                                                    |  |                                                                                                                                                                                                   |  |  |   |                                                                                                                                                                                                   |  |  |   |                                                                                                                                                                                                                                                                                                               |  |  |  |  |     |  |     |  |         |
|                                                                                                                                                                                                                                                                                                                                                                                                                                                                                                                                                                                                                                                                                                                                                                                                                                                                                                                                                                                                                                                                                                                                                                              |  |                                                                                                                                                                                                   |   |                                                                                                                                                                                                   |   |                                                                                                                                                                                                   |   |                                                                                                                                                                                                                                                                                                               |   |                                                                                                                                                                                                                                                                                                               |  |  |  |  |     |  |     |  |         |                                                                                                                                                                                                                                                                                                                                                                                                                                                                                                                                                                                                                                                                                                                                                                                                                                                                                                                                                                                                                                                                                                                                                                    |  |                                                                                                                                                                                                   |  |  |   |                                                                                                                                                                                                   |  |  |   |                                                                                                                                                                                                                                                                                                               |  |  |  |  |     |  |     |  |         |
|                                                                                                                                                                                                                                                                                                                                                                                                                                                                                                                                                                                                                                                                                                                                                                                                                                                                                                                                                                                                                                                                                                                                                                              |  |                                                                                                                                                                                                   |   |                                                                                                                                                                                                   |   |                                                                                                                                                                                                   |   |                                                                                                                                                                                                                                                                                                               |   |                                                                                                                                                                                                                                                                                                               |  |  |  |  |     |  |     |  |         |                                                                                                                                                                                                                                                                                                                                                                                                                                                                                                                                                                                                                                                                                                                                                                                                                                                                                                                                                                                                                                                                                                                                                                    |  |                                                                                                                                                                                                   |  |  |   |                                                                                                                                                                                                   |  |  |   |                                                                                                                                                                                                                                                                                                               |  |  |  |  |     |  |     |  |         |
|                                                                                                                                                                                                                                                                                                                                                                                                                                                                                                                                                                                                                                                                                                                                                                                                                                                                                                                                                                                                                                                                                                                                                                              |  |                                                                                                                                                                                                   |   |                                                                                                                                                                                                   |   |                                                                                                                                                                                                   |   |                                                                                                                                                                                                                                                                                                               |   |                                                                                                                                                                                                                                                                                                               |  |  |  |  |     |  |     |  |         |                                                                                                                                                                                                                                                                                                                                                                                                                                                                                                                                                                                                                                                                                                                                                                                                                                                                                                                                                                                                                                                                                                                                                                    |  |                                                                                                                                                                                                   |  |  |   |                                                                                                                                                                                                   |  |  |   |                                                                                                                                                                                                                                                                                                               |  |  |  |  |     |  |     |  |         |
|                                                                                                                                                                                                                                                                                                                                                                                                                                                                                                                                                                                                                                                                                                                                                                                                                                                                                                                                                                                                                                                                                                                                                                              |  |                                                                                                                                                                                                   |   |                                                                                                                                                                                                   |   |                                                                                                                                                                                                   |   |                                                                                                                                                                                                                                                                                                               |   |                                                                                                                                                                                                                                                                                                               |  |  |  |  |     |  |     |  |         |                                                                                                                                                                                                                                                                                                                                                                                                                                                                                                                                                                                                                                                                                                                                                                                                                                                                                                                                                                                                                                                                                                                                                                    |  |                                                                                                                                                                                                   |  |  |   |                                                                                                                                                                                                   |  |  |   |                                                                                                                                                                                                                                                                                                               |  |  |  |  |     |  |     |  |         |
| D D                                                                                                                                                                                                                                                                                                                                                                                                                                                                                                                                                                                                                                                                                                                                                                                                                                                                                                                                                                                                                                                                                                                                                                          |  | M M                                                                                                                                                                                               |   | Y Y Y Y                                                                                                                                                                                           |   |                                                                                                                                                                                                   |   |                                                                                                                                                                                                                                                                                                               |   |                                                                                                                                                                                                                                                                                                               |  |  |  |  |     |  |     |  |         |                                                                                                                                                                                                                                                                                                                                                                                                                                                                                                                                                                                                                                                                                                                                                                                                                                                                                                                                                                                                                                                                                                                                                                    |  |                                                                                                                                                                                                   |  |  |   |                                                                                                                                                                                                   |  |  |   |                                                                                                                                                                                                                                                                                                               |  |  |  |  |     |  |     |  |         |
| <table border="1" style="display: inline-table; border-collapse: collapse;"> <tr><td style="width: 20px; height: 20px;"></td></tr> <tr><td style="width: 20px; height: 20px;"></td></tr> </table>                                                                                                                                                                                                                                                                                                                                                                                                                                                                                                                                                                                                                                                                                                                                                                                                                                                                                                                                                                            |  |                                                                                                                                                                                                   | - | <table border="1" style="display: inline-table; border-collapse: collapse;"> <tr><td style="width: 20px; height: 20px;"></td></tr> <tr><td style="width: 20px; height: 20px;"></td></tr> </table> |   |                                                                                                                                                                                                   | - | <table border="1" style="display: inline-table; border-collapse: collapse;"> <tr><td style="width: 20px; height: 20px;"></td></tr> </table> |   |                                                                                                                                                                                                                                                                                                               |  |  |  |  |     |  |     |  |         |                                                                                                                                                                                                                                                                                                                                                                                                                                                                                                                                                                                                                                                                                                                                                                                                                                                                                                                                                                                                                                                                                                                                                                    |  |                                                                                                                                                                                                   |  |  |   |                                                                                                                                                                                                   |  |  |   |                                                                                                                                                                                                                                                                                                               |  |  |  |  |     |  |     |  |         |
|                                                                                                                                                                                                                                                                                                                                                                                                                                                                                                                                                                                                                                                                                                                                                                                                                                                                                                                                                                                                                                                                                                                                                                              |  |                                                                                                                                                                                                   |   |                                                                                                                                                                                                   |   |                                                                                                                                                                                                   |   |                                                                                                                                                                                                                                                                                                               |   |                                                                                                                                                                                                                                                                                                               |  |  |  |  |     |  |     |  |         |                                                                                                                                                                                                                                                                                                                                                                                                                                                                                                                                                                                                                                                                                                                                                                                                                                                                                                                                                                                                                                                                                                                                                                    |  |                                                                                                                                                                                                   |  |  |   |                                                                                                                                                                                                   |  |  |   |                                                                                                                                                                                                                                                                                                               |  |  |  |  |     |  |     |  |         |
|                                                                                                                                                                                                                                                                                                                                                                                                                                                                                                                                                                                                                                                                                                                                                                                                                                                                                                                                                                                                                                                                                                                                                                              |  |                                                                                                                                                                                                   |   |                                                                                                                                                                                                   |   |                                                                                                                                                                                                   |   |                                                                                                                                                                                                                                                                                                               |   |                                                                                                                                                                                                                                                                                                               |  |  |  |  |     |  |     |  |         |                                                                                                                                                                                                                                                                                                                                                                                                                                                                                                                                                                                                                                                                                                                                                                                                                                                                                                                                                                                                                                                                                                                                                                    |  |                                                                                                                                                                                                   |  |  |   |                                                                                                                                                                                                   |  |  |   |                                                                                                                                                                                                                                                                                                               |  |  |  |  |     |  |     |  |         |
|                                                                                                                                                                                                                                                                                                                                                                                                                                                                                                                                                                                                                                                                                                                                                                                                                                                                                                                                                                                                                                                                                                                                                                              |  |                                                                                                                                                                                                   |   |                                                                                                                                                                                                   |   |                                                                                                                                                                                                   |   |                                                                                                                                                                                                                                                                                                               |   |                                                                                                                                                                                                                                                                                                               |  |  |  |  |     |  |     |  |         |                                                                                                                                                                                                                                                                                                                                                                                                                                                                                                                                                                                                                                                                                                                                                                                                                                                                                                                                                                                                                                                                                                                                                                    |  |                                                                                                                                                                                                   |  |  |   |                                                                                                                                                                                                   |  |  |   |                                                                                                                                                                                                                                                                                                               |  |  |  |  |     |  |     |  |         |
|                                                                                                                                                                                                                                                                                                                                                                                                                                                                                                                                                                                                                                                                                                                                                                                                                                                                                                                                                                                                                                                                                                                                                                              |  |                                                                                                                                                                                                   |   |                                                                                                                                                                                                   |   |                                                                                                                                                                                                   |   |                                                                                                                                                                                                                                                                                                               |   |                                                                                                                                                                                                                                                                                                               |  |  |  |  |     |  |     |  |         |                                                                                                                                                                                                                                                                                                                                                                                                                                                                                                                                                                                                                                                                                                                                                                                                                                                                                                                                                                                                                                                                                                                                                                    |  |                                                                                                                                                                                                   |  |  |   |                                                                                                                                                                                                   |  |  |   |                                                                                                                                                                                                                                                                                                               |  |  |  |  |     |  |     |  |         |
|                                                                                                                                                                                                                                                                                                                                                                                                                                                                                                                                                                                                                                                                                                                                                                                                                                                                                                                                                                                                                                                                                                                                                                              |  |                                                                                                                                                                                                   |   |                                                                                                                                                                                                   |   |                                                                                                                                                                                                   |   |                                                                                                                                                                                                                                                                                                               |   |                                                                                                                                                                                                                                                                                                               |  |  |  |  |     |  |     |  |         |                                                                                                                                                                                                                                                                                                                                                                                                                                                                                                                                                                                                                                                                                                                                                                                                                                                                                                                                                                                                                                                                                                                                                                    |  |                                                                                                                                                                                                   |  |  |   |                                                                                                                                                                                                   |  |  |   |                                                                                                                                                                                                                                                                                                               |  |  |  |  |     |  |     |  |         |
|                                                                                                                                                                                                                                                                                                                                                                                                                                                                                                                                                                                                                                                                                                                                                                                                                                                                                                                                                                                                                                                                                                                                                                              |  |                                                                                                                                                                                                   |   |                                                                                                                                                                                                   |   |                                                                                                                                                                                                   |   |                                                                                                                                                                                                                                                                                                               |   |                                                                                                                                                                                                                                                                                                               |  |  |  |  |     |  |     |  |         |                                                                                                                                                                                                                                                                                                                                                                                                                                                                                                                                                                                                                                                                                                                                                                                                                                                                                                                                                                                                                                                                                                                                                                    |  |                                                                                                                                                                                                   |  |  |   |                                                                                                                                                                                                   |  |  |   |                                                                                                                                                                                                                                                                                                               |  |  |  |  |     |  |     |  |         |
|                                                                                                                                                                                                                                                                                                                                                                                                                                                                                                                                                                                                                                                                                                                                                                                                                                                                                                                                                                                                                                                                                                                                                                              |  |                                                                                                                                                                                                   |   |                                                                                                                                                                                                   |   |                                                                                                                                                                                                   |   |                                                                                                                                                                                                                                                                                                               |   |                                                                                                                                                                                                                                                                                                               |  |  |  |  |     |  |     |  |         |                                                                                                                                                                                                                                                                                                                                                                                                                                                                                                                                                                                                                                                                                                                                                                                                                                                                                                                                                                                                                                                                                                                                                                    |  |                                                                                                                                                                                                   |  |  |   |                                                                                                                                                                                                   |  |  |   |                                                                                                                                                                                                                                                                                                               |  |  |  |  |     |  |     |  |         |
|                                                                                                                                                                                                                                                                                                                                                                                                                                                                                                                                                                                                                                                                                                                                                                                                                                                                                                                                                                                                                                                                                                                                                                              |  |                                                                                                                                                                                                   |   |                                                                                                                                                                                                   |   |                                                                                                                                                                                                   |   |                                                                                                                                                                                                                                                                                                               |   |                                                                                                                                                                                                                                                                                                               |  |  |  |  |     |  |     |  |         |                                                                                                                                                                                                                                                                                                                                                                                                                                                                                                                                                                                                                                                                                                                                                                                                                                                                                                                                                                                                                                                                                                                                                                    |  |                                                                                                                                                                                                   |  |  |   |                                                                                                                                                                                                   |  |  |   |                                                                                                                                                                                                                                                                                                               |  |  |  |  |     |  |     |  |         |
| D D                                                                                                                                                                                                                                                                                                                                                                                                                                                                                                                                                                                                                                                                                                                                                                                                                                                                                                                                                                                                                                                                                                                                                                          |  | M M                                                                                                                                                                                               |   | Y Y Y Y                                                                                                                                                                                           |   |                                                                                                                                                                                                   |   |                                                                                                                                                                                                                                                                                                               |   |                                                                                                                                                                                                                                                                                                               |  |  |  |  |     |  |     |  |         |                                                                                                                                                                                                                                                                                                                                                                                                                                                                                                                                                                                                                                                                                                                                                                                                                                                                                                                                                                                                                                                                                                                                                                    |  |                                                                                                                                                                                                   |  |  |   |                                                                                                                                                                                                   |  |  |   |                                                                                                                                                                                                                                                                                                               |  |  |  |  |     |  |     |  |         |
| <p><b>Co-payment:</b> _____</p>                                                                                                                                                                                                                                                                                                                                                                                                                                                                                                                                                                                                                                                                                                                                                                                                                                                                                                                                                                                                                                                                                                                                              |  |                                                                                                                                                                                                   |   |                                                                                                                                                                                                   |   |                                                                                                                                                                                                   |   |                                                                                                                                                                                                                                                                                                               |   |                                                                                                                                                                                                                                                                                                               |  |  |  |  |     |  |     |  |         |                                                                                                                                                                                                                                                                                                                                                                                                                                                                                                                                                                                                                                                                                                                                                                                                                                                                                                                                                                                                                                                                                                                                                                    |  |                                                                                                                                                                                                   |  |  |   |                                                                                                                                                                                                   |  |  |   |                                                                                                                                                                                                                                                                                                               |  |  |  |  |     |  |     |  |         |

|                                                                                                                                                                                                                                                                                                                                  |                                                                                                                                                                                                                                                                                      |
|----------------------------------------------------------------------------------------------------------------------------------------------------------------------------------------------------------------------------------------------------------------------------------------------------------------------------------|--------------------------------------------------------------------------------------------------------------------------------------------------------------------------------------------------------------------------------------------------------------------------------------|
| <p><b>from</b></p> <p style="text-align: center;"> <input type="text"/> <input type="text"/> - <input type="text"/> <input type="text"/> - <input type="text"/> <input type="text"/> <input type="text"/> <input type="text"/> </p> <p style="text-align: center;">D D M M Y Y Y Y</p> <p><b>Co-payment:</b> _____</p>           | <p><b>to</b></p> <p style="text-align: center;"> <input type="text"/> <input type="text"/> - <input type="text"/> <input type="text"/> - <input type="text"/> <input type="text"/> <input type="text"/> <input type="text"/> </p> <p style="text-align: center;">D D M M Y Y Y Y</p> |
| <p><b>from</b></p> <p style="text-align: center;"> <input type="text"/> <input type="text"/> - <input type="text"/> <input type="text"/> - <input type="text"/> <input type="text"/> <input type="text"/> <input type="text"/> </p> <p style="text-align: center;">D D M M Y Y Y Y</p> <p><b>Co-payment:</b> _____</p>           | <p><b>to</b></p> <p style="text-align: center;"> <input type="text"/> <input type="text"/> - <input type="text"/> <input type="text"/> - <input type="text"/> <input type="text"/> <input type="text"/> <input type="text"/> </p> <p style="text-align: center;">D D M M Y Y Y Y</p> |
| <p><input type="radio"/> Nursing home</p> <p style="margin-left: 20px;"><i>If yes:</i> <input type="radio"/> full institutional care    <input type="radio"/> short-term nursing care</p>                                                                                                                                        |                                                                                                                                                                                                                                                                                      |
| <p><i>If yes, from</i></p> <p style="text-align: center;"> <input type="text"/> <input type="text"/> - <input type="text"/> <input type="text"/> - <input type="text"/> <input type="text"/> <input type="text"/> <input type="text"/> </p> <p style="text-align: center;">D D M M Y Y Y Y</p> <p><b>Co-payment:</b> _____</p>   | <p><b>to</b></p> <p style="text-align: center;"> <input type="text"/> <input type="text"/> - <input type="text"/> <input type="text"/> - <input type="text"/> <input type="text"/> <input type="text"/> <input type="text"/> </p> <p style="text-align: center;">D D M M Y Y Y Y</p> |
| <p><b>from</b></p> <p style="text-align: center;"> <input type="text"/> <input type="text"/> - <input type="text"/> <input type="text"/> - <input type="text"/> <input type="text"/> <input type="text"/> <input type="text"/> </p> <p style="text-align: center;">D D M M Y Y Y Y</p> <p><b>Co-payment:</b> _____</p>           | <p><b>to</b></p> <p style="text-align: center;"> <input type="text"/> <input type="text"/> - <input type="text"/> <input type="text"/> - <input type="text"/> <input type="text"/> <input type="text"/> <input type="text"/> </p> <p style="text-align: center;">D D M M Y Y Y Y</p> |
| <p><b>from</b></p> <p style="text-align: center;"> <input type="text"/> <input type="text"/> - <input type="text"/> <input type="text"/> - <input type="text"/> <input type="text"/> <input type="text"/> <input type="text"/> </p> <p style="text-align: center;">D D M M Y Y Y Y</p> <p><b>Co-payment:</b> _____</p>           | <p><b>to</b></p> <p style="text-align: center;"> <input type="text"/> <input type="text"/> - <input type="text"/> <input type="text"/> - <input type="text"/> <input type="text"/> <input type="text"/> <input type="text"/> </p> <p style="text-align: center;">D D M M Y Y Y Y</p> |
| <p><input type="radio"/> Similar accomodation: _____</p>                                                                                                                                                                                                                                                                         |                                                                                                                                                                                                                                                                                      |
| <p><i>If yes, from</i></p> <p style="text-align: center;"> <input type="text"/> <input type="text"/>    <input type="text"/> <input type="text"/>    <input type="text"/> <input type="text"/> <input type="text"/> <input type="text"/> </p> <p style="text-align: center;">D D M M Y Y Y Y</p> <p><b>Co-payment:</b> _____</p> | <p><b>to</b></p> <p style="text-align: center;"> <input type="text"/> <input type="text"/> - <input type="text"/> <input type="text"/> - <input type="text"/> <input type="text"/> <input type="text"/> <input type="text"/> </p> <p style="text-align: center;">D D M M Y Y Y Y</p> |

**from** --  
D D M M Y Y Y Y

**to** --  
D D M M Y Y Y Y

Co-payment: \_\_\_\_\_

**B) Was a stay in a day clinic necessary?**

yes  no

*If yes, please checkmark and provide length of stay:*

**from** --  
D D M M Y Y Y Y

**to** --  
D D M M Y Y Y Y

Co-payment: \_\_\_\_\_

**from** --  
D D M M Y Y Y Y

**to** --  
D D M M Y Y Y Y

Co-payment: \_\_\_\_\_

**from** --  
D D M M Y Y Y Y

**to** --  
D D M M Y Y Y Y

Co-payment: \_\_\_\_\_

**(DIAGNOSTIC) EXAMINIATIONS (in the past three months)**

Were diagnostic examinations necessary?

yes  no

*If yes, please checkmark and provide date:*

|                           | Date | Date | Date |
|---------------------------|------|------|------|
| <input type="radio"/> ECG |      |      |      |
| <input type="radio"/> EEG |      |      |      |

|                                                                    |  |  |  |
|--------------------------------------------------------------------|--|--|--|
| <input type="radio"/> Diagnostic X-ray                             |  |  |  |
| <input type="radio"/> Electrophysiological examinations (EMG; NCS) |  |  |  |
| <input type="radio"/> Magnetic resonance imaging (MRI)             |  |  |  |
| <input type="radio"/> Computer tomography (CT)                     |  |  |  |
| <input type="radio"/> Lumbar puncture                              |  |  |  |
| <input type="radio"/> Ultrasound scan                              |  |  |  |
| <input type="radio"/> Other:<br>_____<br>_____                     |  |  |  |

## PATIENT'S CURRENT MEDICATION LIST

|    | Medication (active ingredient) | Daily dose [mg] | Administration *1;2;3;4;5 | Start of medication      |                                      |                           | End of medication |                          |
|----|--------------------------------|-----------------|---------------------------|--------------------------|--------------------------------------|---------------------------|-------------------|--------------------------|
|    |                                |                 |                           | Prior to study           | During the study (date) (DD/MM/YYYY) | See previous assessment** | Date (DD/MM/YYYY) | or ongoing               |
| 1  | Glatiramer acetate             |                 |                           | <input type="checkbox"/> | ___/___/_____                        | <input type="checkbox"/>  | ___/___/_____     | <input type="checkbox"/> |
| 2  | Interferon-β 1a                |                 |                           | <input type="checkbox"/> | ___/___/_____                        | <input type="checkbox"/>  | ___/___/_____     | <input type="checkbox"/> |
| 3  | Interferon-β 1b                |                 |                           | <input type="checkbox"/> | ___/___/_____                        | <input type="checkbox"/>  | ___/___/_____     | <input type="checkbox"/> |
| 4  | Alemtuzumab                    |                 |                           | <input type="checkbox"/> | ___/___/_____                        | <input type="checkbox"/>  | ___/___/_____     | <input type="checkbox"/> |
| 5  | Natalizumab                    |                 |                           | <input type="checkbox"/> | ___/___/_____                        | <input type="checkbox"/>  | ___/___/_____     | <input type="checkbox"/> |
| 6  | Fingolimod                     |                 |                           | <input type="checkbox"/> | ___/___/_____                        | <input type="checkbox"/>  | ___/___/_____     | <input type="checkbox"/> |
| 7  | Siponimod                      |                 |                           | <input type="checkbox"/> | ___/___/_____                        | <input type="checkbox"/>  | ___/___/_____     | <input type="checkbox"/> |
| 8  | Ozanimod                       |                 |                           | <input type="checkbox"/> | ___/___/_____                        | <input type="checkbox"/>  | ___/___/_____     | <input type="checkbox"/> |
| 9  | Ocrelizumab                    |                 |                           | <input type="checkbox"/> | ___/___/_____                        | <input type="checkbox"/>  | ___/___/_____     | <input type="checkbox"/> |
| 10 | Rituximab                      |                 |                           | <input type="checkbox"/> | ___/___/_____                        | <input type="checkbox"/>  | ___/___/_____     | <input type="checkbox"/> |
| 11 | Ofatumumab                     |                 |                           | <input type="checkbox"/> | ___/___/_____                        | <input type="checkbox"/>  | ___/___/_____     | <input type="checkbox"/> |
| 12 | Cladribine                     |                 |                           | <input type="checkbox"/> | ___/___/_____                        | <input type="checkbox"/>  | ___/___/_____     | <input type="checkbox"/> |

|    |                     |  |  |                          |               |                          |               |                          |
|----|---------------------|--|--|--------------------------|---------------|--------------------------|---------------|--------------------------|
| 13 | Dimethyl fumarate   |  |  | <input type="checkbox"/> | ___/___/_____ | <input type="checkbox"/> | ___/___/_____ | <input type="checkbox"/> |
| 14 | Teriflunomide       |  |  | <input type="checkbox"/> | ___/___/_____ | <input type="checkbox"/> | ___/___/_____ | <input type="checkbox"/> |
| 15 | Mitoxantrone        |  |  | <input type="checkbox"/> | ___/___/_____ | <input type="checkbox"/> | ___/___/_____ | <input type="checkbox"/> |
| 16 | High-dose cortisone |  |  | <input type="checkbox"/> | ___/___/_____ | <input type="checkbox"/> | ___/___/_____ | <input type="checkbox"/> |
|    | Other:              |  |  |                          |               |                          |               |                          |
|    | _____               |  |  |                          |               |                          |               |                          |
|    | _____               |  |  |                          |               |                          |               |                          |

\* 1 = p.o. (oral administration, by mouth)

2 = s.c. (subcutaneous administration)

3 = i.v. (intravenous administration, into the vein)

4 = i.m. (intramuscular administration, into the muscle)

5 = other

\*\* if date already entered there



| <b>OTHERE MEDICATION (in the past three months)</b>                                                                                 |             |                        |                     |                          |
|-------------------------------------------------------------------------------------------------------------------------------------|-------------|------------------------|---------------------|--------------------------|
| Were other drugs (e.g., antihypertensive agents, lipid-lowering drugs), for example to alleviate symptoms, prescribed or purchased? |             |                        |                     |                          |
| <input type="radio"/> yes <input type="radio"/> no                                                                                  |             |                        |                     |                          |
| If yes, please checkmark and specify:                                                                                               |             |                        |                     |                          |
| <b>Reason</b>                                                                                                                       | <b>Name</b> | <b>Dose / quantity</b> | <b>Package size</b> | <b>Self (co-)payment</b> |
| <input type="radio"/> Spasticity                                                                                                    |             |                        |                     |                          |
| <input type="radio"/> Pain                                                                                                          |             |                        |                     |                          |
| <input type="radio"/> Cognition                                                                                                     |             |                        |                     |                          |
| <input type="radio"/> Urological complaints                                                                                         |             |                        |                     |                          |
| <input type="radio"/> Fatigue / exhaustion                                                                                          |             |                        |                     |                          |
| <input type="radio"/> Insomnia                                                                                                      |             |                        |                     |                          |
| <input type="radio"/> Depression                                                                                                    |             |                        |                     |                          |
| <input type="radio"/> Other:<br>_____<br>_____<br>_____                                                                             |             |                        |                     |                          |

| <b>MEDICAL AIDS AND ADJUSTMENTS AT HOME (in the past three months)</b>       |                    |                   |                   |
|------------------------------------------------------------------------------|--------------------|-------------------|-------------------|
| Are medical aids necessary?                                                  |                    |                   |                   |
| <input type="radio"/> yes <input type="radio"/> no                           |                    |                   |                   |
| Are adjustments made at home and / or regarding the means of transportation? |                    |                   |                   |
| <input type="radio"/> yes <input type="radio"/> no                           |                    |                   |                   |
| If yes, please checkmark and describe:                                       |                    |                   |                   |
|                                                                              | <b>Description</b> | <b>Price in €</b> | <b>Co-payment</b> |
| <input type="radio"/> Walking aids                                           |                    |                   |                   |
| <input type="radio"/> Visual aids                                            |                    |                   |                   |
| <input type="radio"/> Wheelchair<br>(manual)                                 |                    |                   |                   |
| <input type="radio"/> Wheelchair<br>(electric)                               |                    |                   |                   |
| <input type="radio"/> Adjustments at<br>home                                 |                    |                   |                   |
| <input type="radio"/> Adjustments in the<br>car                              |                    |                   |                   |
| <input type="radio"/> Other:<br>_____                                        |                    |                   |                   |
| <input type="radio"/><br>_____                                               |                    |                   |                   |

| <b>CARE, ASSISTANCE AND TRANSPORT (in the past three months)</b>                                         |                                                                                           |                                           |                                                                                                 |
|----------------------------------------------------------------------------------------------------------|-------------------------------------------------------------------------------------------|-------------------------------------------|-------------------------------------------------------------------------------------------------|
| Is care or assistance required for daily activities and transport (for example to treatment facilities)? |                                                                                           |                                           |                                                                                                 |
| <input type="radio"/> yes <input type="radio"/> no                                                       |                                                                                           |                                           |                                                                                                 |
| If yes, please checkmark and describe in accordance with specifications:                                 |                                                                                           |                                           |                                                                                                 |
|                                                                                                          | <b>Explanation</b><br><i>(Exact description, distance in km from relative to patient)</i> | <b>Hours per day</b><br><i>(for care)</i> | <b>Price in €</b><br><i>(for professional service co-payment from insurance, if applicable)</i> |
| <b>CARE</b>                                                                                              |                                                                                           |                                           |                                                                                                 |
| <input type="radio"/> Help from family / relative                                                        |                                                                                           |                                           |                                                                                                 |
| <input type="radio"/> Professional nursing care                                                          |                                                                                           |                                           |                                                                                                 |
| <input type="radio"/> Other:<br>_____                                                                    |                                                                                           |                                           |                                                                                                 |
| <b>TRANSPORT TO USE HEALTH CARE SERVICES (in the past three months)</b>                                  |                                                                                           |                                           |                                                                                                 |
|                                                                                                          | <b>Distance</b><br><i>in km from caregiver to treatment facility</i>                      | <b>Hours</b>                              | <b>Price in €</b>                                                                               |
| <input type="radio"/> Taxi                                                                               |                                                                                           |                                           |                                                                                                 |
| <input type="radio"/> Care taxi                                                                          |                                                                                           |                                           |                                                                                                 |
| <input type="radio"/> Transport by caregiver                                                             |                                                                                           |                                           |                                                                                                 |
| <input type="radio"/> Patient transport                                                                  |                                                                                           |                                           |                                                                                                 |

| <b>EMERGENCY SERVICES (in the past three months)</b> |             |             |             |
|------------------------------------------------------|-------------|-------------|-------------|
| Did an emergency service have to be called?          |             |             |             |
| <input type="radio"/> yes <input type="radio"/> no   |             |             |             |
| If yes, please checkmark and provide date:           |             |             |             |
|                                                      | <b>Date</b> | <b>Date</b> | <b>Date</b> |
| <input type="radio"/> Ambulance                      |             |             |             |
| <input type="radio"/> Medical emergency service      |             |             |             |
| <input type="radio"/> Emergency practice             |             |             |             |
| <input type="radio"/> Emergency department           |             |             |             |

**WORK ABSCENCES (in the past three months)**

Current or (previous) occupation: \_\_\_\_\_

employed     self-employed

Is the patient still able to work?

yes     no

*If yes, then continue to table A); if no, then continue to table B)*

**A)**

Does the illness lead to missing working hours?

yes     no

*If yes, please checkmark in the table below and quantify:*

|                                                                   | Hours missed per day | Explanation or exact reason |
|-------------------------------------------------------------------|----------------------|-----------------------------|
| <input type="radio"/> short-term                                  |                      |                             |
| <input type="radio"/> long-term<br><i>(starting from 6 weeks)</i> |                      |                             |

**B)**

Please checkmark the appropriate status:

1)  incapacitated \*     unemployable \*\*

**Since when:** \_\_\_\_\_

2)  fully retired     reduction in earning capacity

**Since when:** \_\_\_\_\_

\* **previous** occupation can no longer be pursued

\*\* **neither previous occupation nor any other profession can be pursued**
